# Supplementary material
Source: PubMed Central journal article supplement (PMC5024642)
Supplement: pnas.1610985113.sapp.pdf [file pnas.1610985113.sapp.pdf]

## Supplementary Information (SI Appendix)

### Regulatory network analysis reveals novel regulators of seed desiccation tolerance in *Arabidopsis thaliana*

Sandra Isabel González-Morales, Ricardo A. Chávez Montes, Corina Hayano-Kanashiro, Gerardo Alejo-Jacuinde, Thelma Yerenny Rico-Cambron, Stefan de Folter, and Luis Herrera Estrella.

### Supplementary Methodology

#### Plant materials and growth conditions

*Arabidopsis thaliana* ecotype Col-0, Ler and Ws-2 were used as wild type in this study. The following mutant lines were used: *lec1-1*, *lec2-1(1)*, in Ws-2 background; *abi3-1* and *abi3-5* (2) in Ler background; *fus3-3(3)* in Col-0 background. Plants were grown in a sterile mix of vermiculite and soil in a growth chamber at 22 °C with a 16-h photoperiod at 200  $\mu\text{mol m}^{-2} \text{s}^{-1}$ .

For RNAseq and carbohydrate profiles, flowers were marked and at specific times after flowering (15, 17 and 21 DAF), siliques were harvested from 24 plants and seeds collected and immediately frozen in liquid nitrogen, and stored at -80°C. All samples were collected in triplicates

*Arabidopsis* T-DNA insertion mutant lines were obtained from the Nottingham *Arabidopsis* Stock Centre. Homozygous lines were identified by PCR genotyping to corroborate site of insertion and identify homozygous plants (SI Appendix, Table S10). Plants were grown in the same conditions as described above for the

production of seed. To determine the phenotypes of the T-DNA insertion lines, experiments were performed on three biological replicates of 100 seeds, harvested from a pool of eight plants. The seed storage conditions were 25°C with 10% of relative humidity (RH) for 1, 2, 4 and 8 weeks. Viability of the dry seeds was determined by germination on 0.1X MS media after imbibition of seeds for 2d at 4°C to remove dormancy. To determine ABA sensitivity, seeds were germinated in MS medium in the presence of different concentrations of ABA (mixed isomers; Sigma-Aldrich) 0, 3, 5, 7 and 10  $\mu$ M.

### **RNAseq library preparation and sequencing analysis**

Total RNA was isolated using Concert Plant RNA Purification reagent (Invitrogen) and then re-purified with the TRIZOL reagent (Invitrogen). To ensure high quality RNA samples, RNeasy MinElute Cleanup kit (Qiagen) was used following the manufacturer's instructions. First and second strand cDNA synthesis was performed using 3  $\mu$ g of the total RNA mixture using Message Amp-II kit (Ambion) following the manufacturer's instruction. 10-12 ng of the synthesized cDNA was transcribed by *in vitro* transcription and the resulting 70-90  $\mu$ g of antisense RNA (aRNA) were purified using RNeasy columns (Qiagen). A second round of cDNA synthesis was performed using 20  $\mu$ g of mRNA as template. cDNA synthesis was performed as described above except that random primers (mostly hexamers) were used for first strand synthesis. This procedure yielded approximately 10  $\mu$ g of cDNA that was purified using the DNA Clear Kit for cDNA purification (Ambion). Samples were barcoded for multiplexing using the SOLiD Barcoding Kit. Libraries were sequenced for 50 bps on the SOLiD 4 platform (Applied Biosystems). The

raw data have been deposited in the Gene Expression Omnibus (GEO) database accession number GSE76015.

### **Transcriptome data analysis**

The SOLiD BioScope Whole Transcriptome Analysis (WTA) version 1.2.1 pipeline for single reads was used to align the reads to the TAIR10 Col-0 reference genome available at The Arabidopsis Information Resource. Two perfect matches per location were allowed, aligned reads per exon were counted, and per base coverage calculated. The WTA pipeline CountTags module provides normalized RPKM (reads per kilobase of exon sequence, per million reads) values along with read counts per exon. Custom bash and MySQL scripts were then used to calculate the number of counts per gene model.

### **Statistical analyses**

Gene counts were normalized using edgeR's (v2.9.16)(4) TMM [trimmed mean M ( $\frac{1}{4}$  log fold-change gene expression)] algorithm. For the analysis of differentially expressed genes only genes with at least 5 reads across all samples were included. For the tolerance designation, we tested for differential expression of genes using the multifactor generalized linear models (*glms*) approach in edgeR. We fit negative binomial *glms* with Cox-Reid tagwise dispersion estimates to models that included intolerant and tolerant lines and mutants as factors (SI Appendix, Table. S3). To determine differential expression, we performed likelihood ratio tests by dropping one coefficient from the design matrix (i.e., the "null" model) and comparing it to the full model (4). Differentially expressed genes

(DEGs) between samples were considered based on a 5% false discovery rate (FDR) cutoff.

### **Categorization and functional analysis**

GO annotation analysis on gene clusters was performed using the BiNGO 2.3 plugin tool in Cytoscape version 2.6 with GO\_full and GO\_slim categories, as described in (5). Over-represented GO\_Full categories were identified using a hypergeometric test with a significance threshold of 0.05 after a Benjamini and Hochberg FDR correction(6).

### **Network analysis**

A list of all microarray experiments using the Affymetrix GeneChip ATH1 was downloaded from the EBI ArrayExpress database. The CEL files were manipulated as previously described (7). To avoid possible perturbations of the underlying gene regulatory network, all CEL files corresponding to transgenic samples (mutants, overexpressions, promoter constructions) were excluded. This resulted in 168 CEL files that were normalized using gcRMA under R. CEL files were transformed as previously described (7). The resulting normalized data was used as input for the ARACNe algorithm using the previously reported ARACNe pipeline and list of transcription factors (7).The visualization and manipulation of networks and subnetworks was performed with Cytoscape v2.8.3.

### **Carbohydrate analysis**

50 µg of seeds from 15, 17 and 21 DAF were ground in liquid nitrogen, and soluble sugars extracted twice for 15 min at 75°C with metanol 80% (v/v); then samples

were centrifuged at 5000 rpm for 10 min. The supernatant was dried under vacuum and dissolved in acetonitrile:water (1:1). Carbohydrates were quantified on an LC-MS system composed of the ACQUITY ultra-performance liquid chromatography (UPLC) system (Waters Corporation) fitted to a Q-TOF Premier mass spectrometer (LCT XE Premier, Waters). Conditions for chromatography were as follows: column, ACQUITY HILIC BEH column (2.1×100mm i.d., 1.7 µm, Waters); solvent A, ACN:H<sub>2</sub>O (90:10) + 0.1% NaOH ; solvent B, ACN:H<sub>2</sub>O (30:70) + NaOH t, 0 to 55 min, initial, 100% A and 0% B; 20 min, 40% A and 60% B; 55 min 100% A and 0% B; flow rate, 0.20 mL/min; injection volume 5 µL and column temperature, 35 °C. Conditions for mass spectrometry under negative mode were as follows, capillary voltage, 2.8 kV; cone voltage, 40 V; source temperature, 350°C; desolvation temperature, 100°C; cone gas flow, 30 L/h; desolvation gas flow, 750 L/h; nebulizer and curtain gas, N<sub>2</sub>. The amount of carbohydrates were determined by spectrometer software (MassLynx™ v. 4.1, Micromass) using calibration curves prepared with carbohydrates standards (D-glucose, D-fructose, sucrose, raffinose and stachyose) purchased from Sigma-Aldrich.

### **Construction of overexpression lines**

For pCaV35S::cDNA constructs, the corresponding coding sequence was amplified with the primers indicated for each gene in SI Appendix, Table. S10. PCR products were cloned in pDONR221 and transferred into T-DNA binary vector pFastG02(8). The resultant vectors were used for *Agrobacterium*-mediated transformation of *Arabidopsis* Col-0 and *abi3-5* plants using the floral dip transformation method as previously reported (9). Harvested seeds were spread on MS medium containing

20  $\mu$ M of Phosphinothricin (PPT) for selection of transgenic plants. After selfing, plants with 3:1 segregation rates corresponding to single insertions were selected to produce homozygous lines.

Desiccation tolerance of *abi3-5* TF-overexpressing lines was performed using three biological replicates of 100 seeds, harvested from a pool of 8 plants. Seeds at 25 DAF were harvested and stored at 25°C and 20% RH for 0, 2, 3 and 4 weeks. Viability of the dry seeds was determined by germination on 0.1x MS media after imbibition of seeds for 2d at 4°C to remove dormancy.

### **Gene expression analysis**

Gene-specific primer pairs (SI Appendix, Table S10) designed using the NCBI/Primer-BLAST tool (10) were used for real-time PCR. A total of 10  $\mu$ g of RNA was reverse transcribed using SuperScript® III Reverse Transcriptase (Life Technologies) according to the manufacturer's instructions. Reactions were performed with the SYBR Green PCR Master Mix in an ABI 7500 Fast Real-time system. UBQ10 and TIP4L were used as standards for cDNA content normalization. The thermal cycling program was set to 95 °C for 5 min, 40 cycles of 95 °C for 30 s, 60 °C for 30 s, and 72 °C for 1 min. Results were analyzed using the ABI 7500 on-board software, version 2.0.5 (Applied Biosystems). The real-time PCR was conducted with at least three experimental replicates for each biological sample.

## SUPPLEMENTARY TEXT.

### **Global transcriptional analysis of upregulated genes in desiccation tolerant and intolerant Arabidopsis seeds.**

The Venn diagrams presented in Fig. S2 show the relationship between upregulated DEGs in *lec1-1*, *abi3-5*, *fus3-3* and *lec2-1* with respect to their corresponding wild type. Comparison between tolerant and intolerant mutant pairs such as *lec1-1* and *lec2-1* or *abi3-5* and *abi3-1* with their corresponding Wt controls produced a common set of DEGs that are relevant to the pleiotropic phenotype of the mutants. For example, as *lec2* has a similar phenotype to *lec1* but it is still desiccation tolerant, genes that are differentially expressed in both mutants when compared to the WT should have no direct relevance to the tolerance process.

Comparison of differentially expressed genes of all DI mutants yielded a set of genes that differentially expressed in all DI mutants respect to the DT mutants and corresponding WT. At 15 DAF, 89 upregulated genes were common to all intolerant mutants (*lec1*, *abi3-5* and *fus3-3*) (SI Appendix, Fig. S2). As the level of water loss increased, the number of DEGs also increased; at 17 and 21 DAF a total of 129 and 310 upregulated genes were common to intolerant mutants (SI Appendix, Fig. S2). The expression of these genes is altered in all desiccation intolerant mutants respect to tolerant mutants with related phenotypes or their wild type counterparts (Dataset S8). The highest fold change values of DEGs were reached at 21 DAF, when water loss in the seed is complete.

A subset of DEGs was identified as specific for each mutant. For instance, *fus3-3* showed the highest number of specific DEGs in the three time-points analyzed (827, 1153 and 926 upregulated and 1187, 779 and 587 downregulated genes at 15, 17 and 21 DAF, respectively) (SI Appendix, Fig.S2). The mutant specific DEGs most probably encode genes that are independently regulated by each of these TFs and are related to the specific phenotypes of the corresponding mutant. For example, genes unique to *fus3-3* were mostly related to cell cycle, cell division and ethylene responses, in agreement with previous reports reporting that the *fus3-3* mutation induces ectopic cell divisions in the embryo (11) together with an increased expression of a subset of ethylene responsive genes (12) (SI Appendix, Table S8). Since the reduced expression of these genes is not detected in the other two DT mutants it suggests that these processes are independent of seed DT.

### **Regulatory networks inference**

Datasets of gene expression were obtained as described in the Materials and Methods section. The first dataset, that we denominated TFs-only dataset, is a 168 columns by 2088 rows matrix that correspond to the 2088 TF (SI Appendix, Table S5 and Dataset S9) probe sets present in the ATH1 chip. The second dataset, we named the complete dataset, is 168 by 22810 matrix that contain all 22810 probe sets present in the ATH1 chip. We used both dataset as input to construct regulatory networks using the ARACNe software (13). The ARACNe output is a list of interaction probeset pairs ranked through a Mutual Information value (MI) and its associated p-value (14). Detail for a theoretical background and practical use of



ARACNe have been previously published (7, 14). In a biological context, an interaction between gene A and gene B would indicate that gene A and gene B participate in the same physiological process and, if gene A is a TF and gene B is not TF, the interaction would suggest that the gene A is a transcriptional regulator of gene B (7).

Network construction was concentrated on the 2088 TF probeset and obtained at three data processing inequality (DPI) values, 0.0, 0.1, and 0.2 (SI Appendix, Table S6). DPI is a known information property explained in the (14). A DPI 0.0 means when a three-node triangle is present, the interaction with lowest MI will be removed, as this interaction is considered to represent an indirect interaction. At DPI 1.0 interactions are removed (14) .

After transforming the ARACNe output adjacency files into Cytoscape compatible tables, we obtained the TFs-only (TFsSeedNet, Dataset S9) and complete (FullSeedNet, Dataset S10) databases. SI Appendix, Table S6 shows that the number of edges in the network increases dramatically from DPI 0.0 to DPI 0.1 to DPI 0.2. For this work, a graphical representation of TFSeedNet was obtained at DPI 0.0 while FullSeedNet was obtained at DPI 0.1. The DPI value of FullSeedNet was used to preserve interaction that are removed in DPI 0.0 in order to have a wider view of the genes that could interact with different TFs.

**Table S1. Phenotypes of different lines used in the paper.**

| Phenotype                            | <i>Lines</i> |               |               |               |               |               |
|--------------------------------------|--------------|---------------|---------------|---------------|---------------|---------------|
|                                      | wildtype     | <i>fus3-3</i> | <i>lec1-1</i> | <i>lec2-1</i> | <i>abi3-5</i> | <i>abi3-1</i> |
| Chlorophyll accumulation in dry seed | NO           | NO            | YES           | YES           | YES           | NO            |
| Anthocyanin in cotyledons            | NO           | YES           | YES           | YES           | NO            | NO            |
| Storage protein expression           | Normal       | Reduced       | Reduced       | Reduced       | Reduced       | Normal        |
| Ectopic trichomes on Cotyledons      | NO           | YES           | YES           | YES           | NO            | NO            |
| Seed ABA sensitivity                 | Normal       | Normal        | Normal        | Normal        | Reduced       | Reduced       |
| Desiccation-tolerant seeds           | YES          | NO            | NO            | YES           | NO            | YES           |
| Genetic Background                   | -            | Col-0         | Ws            | Ws            | Ler           | Ler           |

**Table S2. Overview of sequencing and mapping statistics on Arabidopsis genomes.**

| library             | Total reads        | Reads mapped (%)   | Reads uniquely (%) | Genes detected |
|---------------------|--------------------|--------------------|--------------------|----------------|
| <i>lec1-1_15daf</i> | 8,907,428          | 8,907,428 (73.6)   | 5,909,235 (92.4)   | 22,011         |
| <i>lec1-1_17daf</i> | 6,664,483          | 5,000,413 (75.0)   | 4,413,624 (92.0)   | 22,011         |
| <i>lec1-1_21daf</i> | 6,317,389          | 4,560,674 (72.2)   | 3,977,475 (91.4)   | 22,011         |
| <i>lec2-1_15daf</i> | 6,469,212          | 4,983,250 (77.0)   | 4,601,405 (93.3)   | 22,011         |
| <i>lec2-1_17daf</i> | 6,895,879          | 5,119,705 (74.2)   | 4,703,369 (93.3)   | 22,011         |
| <i>lec2-1_21daf</i> | 8,499,125          | 6,305,852 (74.2)   | 5,668,640 (93.4)   | 22,011         |
| <b>Ws_15daf</b>     | 6,441,380          | 4,784,939 (74.3)   | 4,468,431 (93.7)   | 22,011         |
| <b>Ws_17daf</b>     | 5,562,550          | 4,242,351 (76.3)   | 3,934,393 (93.0)   | 22,011         |
| <b>Ws_21daf</b>     | 7,275,259          | 5,402,772 (74.3)   | 5,002,734 (93.5)   | 22,011         |
| <i>abi3-5_15daf</i> | 5,112,140          | 3,941,394 (77.1)   | 3,572,798 (91.6)   | 22,011         |
| <i>abi3-5_17daf</i> | 5,180,272          | 3,989,412 (77.0)   | 3,652,498 (92.4)   | 22,011         |
| <i>abi3-5_21daf</i> | 5,678,982          | 4,019,785 (70.8)   | 3,630,208 (91.5)   | 22,011         |
| <i>abi3-1_15daf</i> | 5,963,995          | 4,355,175 (73.0)   | 3,993,489 (92.2)   | 22,011         |
| <i>abi3-1_17daf</i> | 4,621,130          | 3,629,414 (78.5)   | 3,368,136 (93.0)   | 22,011         |
| <i>abi3-1_21daf</i> | 3,632,793          | 2,806,398 (77.3)   | 2,568,817 (92.3)   | 22,011         |
| <b>Ler_15daf</b>    | 8,408,818          | 6,327,513 (75.2)   | 5,860,618 (92.9)   | 22,011         |
| <b>Ler_17daf</b>    | 5,538,070          | 4,125,875 (74.5)   | 3,777,419 (92.5)   | 22,011         |
| <b>Ler_21daf</b>    | 5,241,362          | 4,017,069 (76.6)   | 3,695,767 (92.5)   | 22,011         |
| <i>fus3-3_15daf</i> | 11,058,194         | 8,442,157 (76.3)   | 7,717,931 (93.2)   | 22,011         |
| <i>fus3-3_17daf</i> | 13,368,320         | 10,544,256 (78.9)  | 9,452,736 (92.3)   | 22,011         |
| <i>fus3-3_21daf</i> | 7,491,466          | 5,859,888 (78.2)   | 5,103,317 (91.9)   | 22,011         |
| <b>Col-0_15daf</b>  | 6,365,373          | 4,862,900 (76.4)   | 4,495,715 (92.8)   | 22,011         |
| <b>Col-0_17daf</b>  | 3,510,513          | 2,693,072 (76.7)   | 2,464,782 (92.4)   | 22,011         |
| <b>Col-0_21daf</b>  | 8,101,628          | 6,195,345 (76.5)   | 5,796,084 (93.8)   | 22,011         |
| <b>Total reads</b>  | <b>162,305,761</b> | <b>125,117,037</b> | <b>111,829,621</b> |                |

Table S3. Generalized linear model fitted to desiccation tolerance seeds data.

| Comparison Model                                                                                                                                                                   | Interpretation                                     | Developmental stage sampled | Differentially Expressed Genes                          |
|------------------------------------------------------------------------------------------------------------------------------------------------------------------------------------|----------------------------------------------------|-----------------------------|---------------------------------------------------------|
| <p>[ (<i>lec1-1</i> - Ws) - (<i>fus3-3</i> - Col-0) - (<i>abi3-5</i> - Ler)]</p> <p style="text-align: center;"><b>vs</b></p> <p>[(<i>lec2-1</i> - Ws) - (<i>abi3-1</i>- Ler)]</p> | Desiccation tolerance-specific mutants differences | 15 DAF                      | <p>Upregulated<br/>434</p> <p>Downregulated<br/>548</p> |
| <p>[ (<i>lec1-1</i> - Ws) - (<i>fus3-3</i> - Col-0) - (<i>abi3-5</i> - Ler)]</p> <p style="text-align: center;"><b>vs</b></p> <p>[(<i>lec2-1</i> - Ws) - (<i>abi3-1</i>- Ler)]</p> | intolerant lines <b>vs</b> tolerant lines          | 17 DAF                      | <p>Upregulated<br/>893</p> <p>Downregulated<br/>432</p> |
| <p>[ (<i>lec1-1</i> - Ws) - (<i>fus3-3</i> - Col-0) - (<i>abi3-5</i> - Ler)]</p> <p style="text-align: center;"><b>vs</b></p> <p>[(<i>lec2-1</i> - Ws) - (<i>abi3-1</i>- Ler)]</p> |                                                    | 21 DAF                      | <p>Upregulate<br/>993</p> <p>Downregulated<br/>481</p>  |

**Table S4. DEGs from pairwise comparison.**

| <b>Comparison</b>             | <b>Upregulated DEGs</b> | <b>Downregulated DEGs</b> |
|-------------------------------|-------------------------|---------------------------|
| <i>lec1-1</i> vs Ws 15 DAF    | 1535                    | 992                       |
| <i>lec1-1</i> vs Ws 17 DAF    | 2164                    | 1441                      |
| <i>lec1-1</i> vs Ws 21 DAF    | 2397                    | 1057                      |
| <i>lec2-1</i> vs Ws 15 DAF    | 418                     | 98                        |
| <i>lec2-1</i> vs Ws 17 DAF    | 450                     | 23                        |
| <i>lec2-1</i> vs Ws 21 DAF    | 883                     | 50                        |
| <i>abi3-5</i> vs Ler 15 DAF   | 476                     | 538                       |
| <i>abi3-5</i> vs Ler 17 DAF   | 946                     | 1128                      |
| <i>abi3-5</i> vs Ler 21 DAF   | 2104                    | 1660                      |
| <i>abi3-1</i> vs Ler 15 DAF   | 2                       | 0                         |
| <i>abi3-1</i> vs Ler 17 DAF   | 425                     | 397                       |
| <i>abi3-1</i> vs Ler 21 DAF   | 0                       | 0                         |
| <i>fus3-3</i> vs Col-0 15 DAF | 1610                    | 1807                      |
| <i>fus3-3</i> vs Col-0 17 DAF | 2522                    | 1429                      |
| <i>fus3-3</i> vs Col-0 21 DAF | 2066                    | 1766                      |

**Table S5 . CEL. Files used in this study**

| <b>Accession</b> | <b>Description of experiment</b>                                                               | <b>CEL_file</b> |
|------------------|------------------------------------------------------------------------------------------------|-----------------|
| E-ATMX-1         | Transcription profiling of Arabidopsis wild type seeds grown under sulfur-deficient conditions | CEL_C1.CEL      |
| E-ATMX-1         | Transcription profiling of Arabidopsis wild type seeds grown under sulfur-deficient conditions | CEL_C2.CEL      |
| E-ATMX-1         | Transcription profiling of Arabidopsis wild type seeds grown under sulfur-deficient conditions | CEL_DS1.CEL     |
| E-ATMX-1         | Transcription profiling of Arabidopsis wild type seeds grown under sulfur-deficient conditions | CEL_DS2.CEL     |
| E-GEOD-1051      | Transcription profiling by array of Arabidopsis seeds mutant for lec1                          | GSM10445.CEL    |
| E-GEOD-1051      | Transcription profiling by array of Arabidopsis seeds mutant for lec1                          | GSM10448.CEL    |
| E-GEOD-1051      | Transcription profiling by array of Arabidopsis seeds mutant for lec1                          | GSM10449.CEL    |
| E-GEOD-1051      | Transcription profiling by array of Arabidopsis seeds mutant for lec1                          | GSM10451.CEL    |
| E-GEOD-1051      | Transcription profiling by array of Arabidopsis seeds mutant for lec1                          | GSM10453.CEL    |
| E-GEOD-1051      | Transcription profiling by array of Arabidopsis seeds mutant for lec1                          | GSM10477.CEL    |
| E-GEOD-1051      | Transcription profiling by array of Arabidopsis seeds mutant for lec1                          | GSM10481.CEL    |
| E-GEOD-11262     | Transcription profiling by array of Arabidopsis seed compartments at the globular embryo stage | GSM284384.CEL   |
| E-GEOD-11262     | Transcription profiling by array of Arabidopsis seed compartments at the globular embryo stage | GSM284385.CEL   |
| E-GEOD-11262     | Transcription profiling by array of Arabidopsis seed compartments at the globular embryo stage | GSM284386.CEL   |
| E-GEOD-11262     | Transcription profiling by array of Arabidopsis seed compartments at the globular embryo stage | GSM284387.CEL   |
| E-GEOD-11262     | Transcription profiling by array of Arabidopsis seed compartments at the globular embryo stage | GSM284389.CEL   |
| E-GEOD-          | Transcription profiling by array of Arabidopsis seed                                           | GSM284391.CEL   |

|              |                                                                                                    |               |
|--------------|----------------------------------------------------------------------------------------------------|---------------|
| 11262        | compartments at the globular embryo stage                                                          |               |
| E-GEOD-11262 | Transcription profiling by array of Arabidopsis seed compartments at the globular embryo stage     | GSM284392.CEL |
| E-GEOD-11262 | Transcription profiling by array of Arabidopsis seed compartments at the globular embryo stage     | GSM284394.CEL |
| E-GEOD-11262 | Transcription profiling by array of Arabidopsis seed compartments at the globular embryo stage     | GSM284395.CEL |
| E-GEOD-11262 | Transcription profiling by array of Arabidopsis seed compartments at the globular embryo stage     | GSM284396.CEL |
| E-GEOD-11262 | Transcription profiling by array of Arabidopsis seed compartments at the globular embryo stage     | GSM284397.CEL |
| E-GEOD-11262 | Transcription profiling by array of Arabidopsis seed compartments at the globular embryo stage     | GSM284398.CEL |
| E-GEOD-11852 | Transcription profiling by array of Arabidopsis mutant for pickle after treatment with uniconazole | GSM299322.CEL |
| E-GEOD-11852 | Transcription profiling by array of Arabidopsis mutant for pickle after treatment with uniconazole | GSM299323.CEL |
| E-GEOD-11852 | Transcription profiling by array of Arabidopsis mutant for pickle after treatment with uniconazole | GSM299324.CEL |
| E-GEOD-11852 | Transcription profiling by array of Arabidopsis mutant for pickle after treatment with uniconazole | GSM299325.CEL |
| E-GEOD-11852 | Transcription profiling by array of Arabidopsis mutant for pickle after treatment with uniconazole | GSM299326.CEL |
| E-GEOD-11852 | Transcription profiling by array of Arabidopsis mutant for pickle after treatment with uniconazole | GSM299333.CEL |
| E-GEOD-11852 | Transcription profiling by array of Arabidopsis mutant for pickle after treatment with uniconazole | GSM299335.CEL |
| E-GEOD-11852 | Transcription profiling by array of Arabidopsis mutant for pickle after treatment with uniconazole | GSM299336.CEL |
| E-GEOD-11852 | Transcription profiling by array of Arabidopsis mutant for pickle after treatment with uniconazole | GSM299337.CEL |
| E-GEOD-12402 | Transcription profiling by array of Arabidopsis seed compartments at the pre-globular stage        | GSM311273.CEL |
| E-GEOD-12402 | Transcription profiling by array of Arabidopsis seed compartments at the pre-globular stage        | GSM311274.CEL |

|              |                                                                                                 |               |
|--------------|-------------------------------------------------------------------------------------------------|---------------|
| E-GEOD-12402 | Transcription profiling by array of Arabidopsis seed compartments at the pre-globular stage     | GSM311275.CEL |
| E-GEOD-12402 | Transcription profiling by array of Arabidopsis seed compartments at the pre-globular stage     | GSM311277.CEL |
| E-GEOD-12402 | Transcription profiling by array of Arabidopsis seed compartments at the pre-globular stage     | GSM311278.CEL |
| E-GEOD-12402 | Transcription profiling by array of Arabidopsis seed compartments at the pre-globular stage     | GSM311279.CEL |
| E-GEOD-12402 | Transcription profiling by array of Arabidopsis seed compartments at the pre-globular stage     | GSM311280.CEL |
| E-GEOD-12402 | Transcription profiling by array of Arabidopsis seed compartments at the pre-globular stage     | GSM311281.CEL |
| E-GEOD-12402 | Transcription profiling by array of Arabidopsis seed compartments at the pre-globular stage     | GSM311282.CEL |
| E-GEOD-12402 | Transcription profiling by array of Arabidopsis seed compartments at the pre-globular stage     | GSM311283.CEL |
| E-GEOD-12402 | Transcription profiling by array of Arabidopsis seed compartments at the pre-globular stage     | GSM311284.CEL |
| E-GEOD-12402 | Transcription profiling by array of Arabidopsis seed compartments at the pre-globular stage     | GSM311285.CEL |
| E-GEOD-12402 | Transcription profiling by array of Arabidopsis seed compartments at the pre-globular stage     | GSM311286.CEL |
| E-GEOD-12403 | Transcription profiling by array of Arabidopsis seed compartments at the linear-cotyledon stage | GSM311288.CEL |
| E-GEOD-12403 | Transcription profiling by array of Arabidopsis seed compartments at the linear-cotyledon stage | GSM311289.CEL |
| E-GEOD-12403 | Transcription profiling by array of Arabidopsis seed compartments at the linear-cotyledon stage | GSM311290.CEL |
| E-GEOD-12403 | Transcription profiling by array of Arabidopsis seed compartments at the linear-cotyledon stage | GSM311291.CEL |
| E-GEOD-12403 | Transcription profiling by array of Arabidopsis seed compartments at the linear-cotyledon stage | GSM311292.CEL |
| E-GEOD-12403 | Transcription profiling by array of Arabidopsis seed compartments at the linear-cotyledon stage | GSM311293.CEL |
| E-GEOD-12403 | Transcription profiling by array of Arabidopsis seed compartments at the linear-cotyledon stage | GSM311294.CEL |



|              |                                                                                                 |               |
|--------------|-------------------------------------------------------------------------------------------------|---------------|
| E-GEOD-12403 | Transcription profiling by array of Arabidopsis seed compartments at the linear-cotyledon stage | GSM311295.CEL |
| E-GEOD-12403 | Transcription profiling by array of Arabidopsis seed compartments at the linear-cotyledon stage | GSM311296.CEL |
| E-GEOD-14229 | Transcription profiling by array of Arabidopsis mutant for myb5                                 | GSM356564.CEL |
| E-GEOD-14229 | Transcription profiling by array of Arabidopsis mutant for myb5                                 | GSM356565.CEL |
| E-GEOD-14229 | Transcription profiling by array of Arabidopsis mutant for myb5                                 | GSM356566.CEL |
| E-GEOD-14229 | Transcription profiling by array of Arabidopsis mutant for myb5                                 | GSM356567.CEL |
| E-GEOD-15160 | Transcription profiling by array of Arabidopsis seed compartments at the heart stage            | GSM378647.CEL |
| E-GEOD-15160 | Transcription profiling by array of Arabidopsis seed compartments at the heart stage            | GSM378649.CEL |
| E-GEOD-15160 | Transcription profiling by array of Arabidopsis seed compartments at the heart stage            | GSM378650.CEL |
| E-GEOD-15160 | Transcription profiling by array of Arabidopsis seed compartments at the heart stage            | GSM378651.CEL |
| E-GEOD-15160 | Transcription profiling by array of Arabidopsis seed compartments at the heart stage            | GSM378653.CEL |
| E-GEOD-15160 | Transcription profiling by array of Arabidopsis seed compartments at the heart stage            | GSM378654.CEL |
| E-GEOD-15160 | Transcription profiling by array of Arabidopsis seed compartments at the heart stage            | GSM378655.CEL |
| E-GEOD-15160 | Transcription profiling by array of Arabidopsis seed compartments at the heart stage            | GSM378656.CEL |
| E-GEOD-15160 | Transcription profiling by array of Arabidopsis seed compartments at the heart stage            | GSM378657.CEL |
| E-GEOD-15160 | Transcription profiling by array of Arabidopsis seed compartments at the heart stage            | GSM378658.CEL |
| E-GEOD-15160 | Transcription profiling by array of Arabidopsis seed compartments at the heart stage            | GSM378659.CEL |
| E-GEOD-15160 | Transcription profiling by array of Arabidopsis seed compartments at the heart stage            | GSM378660.CEL |

|              |                                                                                             |               |
|--------------|---------------------------------------------------------------------------------------------|---------------|
| E-GEOD-15165 | Transcription profiling by array of Arabidopsis seed compartments at the mature green stage | GSM378733.CEL |
| E-GEOD-15165 | Transcription profiling by array of Arabidopsis seed compartments at the mature green stage | GSM378734.CEL |
| E-GEOD-15165 | Transcription profiling by array of Arabidopsis seed compartments at the mature green stage | GSM378735.CEL |
| E-GEOD-15165 | Transcription profiling by array of Arabidopsis seed compartments at the mature green stage | GSM378736.CEL |
| E-GEOD-15165 | Transcription profiling by array of Arabidopsis seed compartments at the mature green stage | GSM378737.CEL |
| E-GEOD-15165 | Transcription profiling by array of Arabidopsis seed compartments at the mature green stage | GSM378738.CEL |
| E-GEOD-15165 | Transcription profiling by array of Arabidopsis seed compartments at the mature green stage | GSM378739.CEL |
| E-GEOD-15165 | Transcription profiling by array of Arabidopsis seed compartments at the mature green stage | GSM378740.CEL |
| E-GEOD-15165 | Transcription profiling by array of Arabidopsis seed compartments at the mature green stage | GSM378741.CEL |
| E-GEOD-15165 | Transcription profiling by array of Arabidopsis seed compartments at the mature green stage | GSM378742.CEL |
| E-GEOD-15165 | Transcription profiling by array of Arabidopsis seed compartments at the mature green stage | GSM378743.CEL |
| E-GEOD-15165 | Transcription profiling by array of Arabidopsis seed compartments at the mature green stage | GSM378744.CEL |
| E-GEOD-15165 | Transcription profiling by array of Arabidopsis seed compartments at the mature green stage | GSM378745.CEL |
| E-GEOD-15165 | Transcription profiling by array of Arabidopsis seed compartments at the mature green stage | GSM378746.CEL |
| E-GEOD-20039 | Expression data from Arabidopsis seed compartments at the bending coyledon stage            | GSM501157.CEL |
| E-GEOD-20039 | Expression data from Arabidopsis seed compartments at the bending coyledon stage            | GSM501158.CEL |
| E-GEOD-20039 | Expression data from Arabidopsis seed compartments at the bending coyledon stage            | GSM501159.CEL |
| E-GEOD-20039 | Expression data from Arabidopsis seed compartments at the bending coyledon stage            | GSM501160.CEL |

|              |                                                                                              |               |
|--------------|----------------------------------------------------------------------------------------------|---------------|
| E-GEOD-20039 | Expression data from Arabidopsis seed compartments at the bending coyledon stage             | GSM501161.CEL |
| E-GEOD-20039 | Expression data from Arabidopsis seed compartments at the bending coyledon stage             | GSM501162.CEL |
| E-GEOD-20039 | Expression data from Arabidopsis seed compartments at the bending coyledon stage             | GSM501163.CEL |
| E-GEOD-20039 | Expression data from Arabidopsis seed compartments at the bending coyledon stage             | GSM501164.CEL |
| E-GEOD-20039 | Expression data from Arabidopsis seed compartments at the bending coyledon stage             | GSM501165.CEL |
| E-GEOD-20039 | Expression data from Arabidopsis seed compartments at the bending coyledon stage             | GSM501166.CEL |
| E-GEOD-20039 | Expression data from Arabidopsis seed compartments at the bending coyledon stage             | GSM501167.CEL |
| E-GEOD-20039 | Expression data from Arabidopsis seed compartments at the bending coyledon stage             | GSM501168.CEL |
| E-GEOD-24887 | Transcription profiling by array of Arabidopsis wild-type and dcl1-15 torpedo-staged embryos | GSM612043.CEL |
| E-GEOD-24887 | Transcription profiling by array of Arabidopsis wild-type and dcl1-15 torpedo-staged embryos | GSM612044.CEL |
| E-GEOD-24887 | Transcription profiling by array of Arabidopsis wild-type and dcl1-15 torpedo-staged embryos | GSM612045.CEL |
| E-GEOD-28747 | Transcription profiling by array of Arabidopsis ft-1 mutants                                 | GSM712386.CEL |
| E-GEOD-28747 | Transcription profiling by array of Arabidopsis ft-1 mutants                                 | GSM712387.CEL |
| E-GEOD-28747 | Transcription profiling by array of Arabidopsis ft-1 mutants                                 | GSM712388.CEL |
| E-GEOD-28747 | Transcription profiling by array of Arabidopsis ft-1 mutants                                 | GSM712392.CEL |
| E-GEOD-28747 | Transcription profiling by array of Arabidopsis ft-1 mutants                                 | GSM712393.CEL |
| E-GEOD-28747 | Transcription profiling by array of Arabidopsis ft-1 mutants                                 | GSM712394.CEL |
| E-GEOD-28747 | Transcription profiling by array of Arabidopsis ft-1 mutants                                 | GSM712395.CEL |

|              |                                                                                                                       |                                  |
|--------------|-----------------------------------------------------------------------------------------------------------------------|----------------------------------|
| E-GEOD-28747 | Transcription profiling by array of Arabidopsis ft-1 mutants                                                          | GSM712396.CEL                    |
| E-GEOD-28747 | Transcription profiling by array of Arabidopsis ft-1 mutants                                                          | GSM712397.CEL                    |
| E-GEOD-30223 | Transcription profiling by array of Arabidopsis seeds during the germination ripening, stratification and germination | GSM748466_Har_rep_1_Arab.CEL     |
| E-GEOD-30223 | Transcription profiling by array of Arabidopsis seeds during the germination ripening, stratification and germination | GSM748467_Har_rep_2_Arab.CEL     |
| E-GEOD-30223 | Transcription profiling by array of Arabidopsis seeds during the germination ripening, stratification and germination | GSM748468_Har_rep_3_Arab.CEL     |
| E-GEOD-30223 | Transcription profiling by array of Arabidopsis seeds during the germination ripening, stratification and germination | GSM748469_0_h_dry_rep_1_Arab.CEL |
| E-GEOD-30223 | Transcription profiling by array of Arabidopsis seeds during the germination ripening, stratification and germination | GSM748470_0_h_dry_rep_2_Arab.CEL |
| E-GEOD-30223 | Transcription profiling by array of Arabidopsis seeds during the germination ripening, stratification and germination | GSM748471_0_h_dry_rep_3_Arab.CEL |
| E-GEOD-5634  | Transcription profiling by array of Arabidopsis seeds and siliques at different developmental stages                  | GSM131694.CEL                    |
| E-GEOD-5634  | Transcription profiling by array of Arabidopsis seeds and siliques at different developmental stages                  | GSM131695.CEL                    |
| E-GEOD-5634  | Transcription profiling by array of Arabidopsis seeds and siliques at different developmental stages                  | GSM131696.CEL                    |
| E-GEOD-5634  | Transcription profiling by array of Arabidopsis seeds and siliques at different developmental stages                  | GSM131697.CEL                    |
| E-GEOD-5634  | Transcription profiling by array of Arabidopsis seeds and siliques at different developmental stages                  | GSM131698.CEL                    |
| E-GEOD-5634  | Transcription profiling by array of Arabidopsis seeds and siliques at different developmental stages                  | GSM131699.CEL                    |
| E-GEOD-5634  | Transcription profiling by array of Arabidopsis seeds and siliques at different developmental stages                  | GSM131700.CEL                    |
| E-GEOD-      | Transcription profiling by array of Arabidopsis seeds                                                                 | GSM131701.CEL                    |

|             |                                                                                                      |               |
|-------------|------------------------------------------------------------------------------------------------------|---------------|
| 5634        | and siliques at different developmental stages                                                       |               |
| E-GEOD-5634 | Transcription profiling by array of Arabidopsis seeds and siliques at different developmental stages | GSM131702.CEL |
| E-GEOD-5634 | Transcription profiling by array of Arabidopsis seeds and siliques at different developmental stages | GSM131703.CEL |
| E-GEOD-5634 | Transcription profiling by array of Arabidopsis seeds and siliques at different developmental stages | GSM131705.CEL |
| E-GEOD-5634 | Transcription profiling by array of Arabidopsis seeds and siliques at different developmental stages | GSM131706.CEL |
| E-GEOD-5634 | Transcription profiling by array of Arabidopsis seeds and siliques at different developmental stages | GSM131707.CEL |
| E-GEOD-5634 | Transcription profiling by array of Arabidopsis seeds and siliques at different developmental stages | GSM131708.CEL |
| E-GEOD-5641 | Transcription profiling by array of Arabidopsis mutant for mdh                                       | GSM131848.CEL |
| E-GEOD-5641 | Transcription profiling by array of Arabidopsis mutant for mdh                                       | GSM131849.CEL |
| E-GEOD-5687 | Transcription profiling by array of Arabidopsis seeds after incubation at different temperatures     | GSM133117.CEL |
| E-GEOD-5687 | Transcription profiling by array of Arabidopsis seeds after incubation at different temperatures     | GSM133118.CEL |
| E-GEOD-5687 | Transcription profiling by array of Arabidopsis seeds after incubation at different temperatures     | GSM133119.CEL |
| E-GEOD-5687 | Transcription profiling by array of Arabidopsis seeds after incubation at different temperatures     | GSM133120.CEL |
| E-GEOD-5700 | Transcription profiling by array of Arabidopsis after treatment with abscisic acid                   | GSM133304.CEL |
| E-GEOD-5700 | Transcription profiling by array of Arabidopsis after treatment with abscisic acid                   | GSM133310.CEL |
| E-GEOD-5701 | Transcription profiling by array of Arabidopsis after treatment with gibberellin                     | GSM133312.CEL |
| E-GEOD-5701 | Transcription profiling by array of Arabidopsis after treatment with gibberellin                     | GSM133314.CEL |
| E-GEOD-5701 | Transcription profiling by array of Arabidopsis after treatment with gibberellin                     | GSM133315.CEL |

|             |                                                                                  |               |
|-------------|----------------------------------------------------------------------------------|---------------|
| E-GEOD-5701 | Transcription profiling by array of Arabidopsis after treatment with gibberellin | GSM133316.CEL |
| E-GEOD-5701 | Transcription profiling by array of Arabidopsis after treatment with gibberellin | GSM133318.CEL |
| E-GEOD-5701 | Transcription profiling by array of Arabidopsis after treatment with gibberellin | GSM133320.CEL |
| E-GEOD-5701 | Transcription profiling by array of Arabidopsis after treatment with gibberellin | GSM133321.CEL |
| E-GEOD-5701 | Transcription profiling by array of Arabidopsis after treatment with gibberellin | GSM133322.CEL |
| E-GEOD-5730 | Transcription profiling by array of Arabidopsis embryo tissues                   | GSM133758.CEL |
| E-GEOD-5730 | Transcription profiling by array of Arabidopsis embryo tissues                   | GSM133759.CEL |
| E-GEOD-5730 | Transcription profiling by array of Arabidopsis embryo tissues                   | GSM133761.CEL |
| E-GEOD-5730 | Transcription profiling by array of Arabidopsis embryo tissues                   | GSM133762.CEL |
| E-GEOD-5730 | Transcription profiling by array of Arabidopsis embryo tissues                   | GSM133763.CEL |
| E-GEOD-5730 | Transcription profiling by array of Arabidopsis embryo tissues                   | GSM133767.CEL |
| E-GEOD-5730 | Transcription profiling by array of Arabidopsis embryo tissues                   | GSM133769.CEL |
| E-GEOD-5730 | Transcription profiling by array of Arabidopsis embryo tissues                   | GSM133770.CEL |
| E-GEOD-5730 | Transcription profiling by array of Arabidopsis embryo tissues                   | GSM133771.CEL |
| E-GEOD-5730 | Transcription profiling by array of Arabidopsis embryo tissues                   | GSM133772.CEL |
| E-GEOD-5730 | Transcription profiling by array of Arabidopsis embryo tissues                   | GSM133775.CEL |
| E-GEOD-5730 | Transcription profiling by array of Arabidopsis embryo tissues                   | GSM133777.CEL |
| E-GEOD-5730 | Transcription profiling by array of Arabidopsis embryo tissues                   | GSM133779.CEL |

|             |                                                                                                                                  |                                  |
|-------------|----------------------------------------------------------------------------------------------------------------------------------|----------------------------------|
| E-GEOD-5730 | Transcription profiling by array of Arabidopsis embryo tissues                                                                   | GSM133780.CEL                    |
| E-GEOD-5730 | Transcription profiling by array of Arabidopsis embryo tissues                                                                   | GSM133781.CEL                    |
| E-MEXP-1607 | Transcription profiling by array of Arabidopsis seeds after treatment with EL6 and GR24 to investigate the effect on germination | DMSO_rep1.CEL                    |
| E-MEXP-849  | Transcription profiling of Arabidopsis seed and flowers to identify DELLA regulated transcripts                                  | PJR-Dongni-seed-la-er-210404.CEL |
| E-MEXP-849  | Transcription profiling of Arabidopsis seed and flowers to identify DELLA regulated transcripts                                  | PJR-Dongni-seed-la-er-230304.CEL |
| E-TABM-1007 | Transcription profiling by array of Arabidopsis mutant for fis2                                                                  | caquinoof_20080327_wt_2-v4.CEL   |
| E-TABM-1007 | Transcription profiling by array of Arabidopsis mutant for fis2                                                                  | caquinoof_20080327_wt_3-v4.CEL   |
| E-TABM-17   | Transcription profiling by array of organism parts from different strains of Arabidopsis                                         | ATGE_79_A.CEL                    |
| E-TABM-17   | Transcription profiling by array of organism parts from different strains of Arabidopsis                                         | ATGE_79_B.CEL                    |

**Table S6.** Number of nodes and edges in the TFsSeedNet and FullSeedNet obtained at DPI 0.0, 0.1 and 0.2

| <b>DPI</b>         | <b>Nodes</b> | <b>Edges</b> |
|--------------------|--------------|--------------|
| <b>TFsSeedNet</b>  |              |              |
| <b>0.0</b>         | 2068         | 3745         |
| <b>0.1</b>         | 2068         | 16608        |
| <b>0.2</b>         | 2068         | 59079        |
| <b>FullSeedNet</b> |              |              |
| <b>0.0</b>         | 22553        | 89045        |
| <b>0.1</b>         | 22553        | 372424       |
| <b>0.2</b>         | 22553        | 2570778      |

Nodes and edges present at DPI 0.0 are part of the network obtained at DPI 0.1 and both are part of the network obtained at DPI 0.2.



**Table S7. Motifs enrichment in DT subnetworks.**

| <b>Genes of subnetworks</b>  | <b>Motif identified</b>      | <b>No. Genes with this element</b> | <b>No. of elements</b> | <b>P-value</b>      |
|------------------------------|------------------------------|------------------------------------|------------------------|---------------------|
| <b>snetFullDT1 at 15DAF</b>  | ABRE-like binding site motif | 28                                 | 42                     | < 10 <sup>-3</sup>  |
|                              | AtMYC2 BS in RD22            | 42                                 | 59                     | < 10 <sup>-4</sup>  |
|                              | GADOWNAT                     | 17                                 | 21                     | < 10 <sup>-3</sup>  |
|                              | RY-repeat promoter motif     | 9                                  | 20                     | < 10 <sup>-3</sup>  |
|                              | ACGTABREMOTIFA2OSEM          | 24                                 | 33                     | < 10 <sup>-4</sup>  |
|                              | CACGTGMOTIF                  | 25                                 | 66                     | < 10 <sup>-4</sup>  |
|                              | MYCATERD1                    | 42                                 | 59                     | < 10 <sup>-4</sup>  |
| <b>snetFullDT1 at 17DAF</b>  | ABFs binding site motif      | 12                                 | 15                     | < 10 <sup>-5</sup>  |
|                              | ABRE-like binding site motif | 44                                 | 85                     | < 10 <sup>-10</sup> |
|                              | ACGTABREMOTIFA2OSEM          | 36                                 | 70                     | < 10 <sup>-10</sup> |
|                              | DRE core motif               | 30                                 | 41                     | < 10 <sup>-4</sup>  |
|                              | GBF1/2/3 BS in ADH1          | 7                                  | 14                     | < 10 <sup>-4</sup>  |
|                              | RY-repeat promoter motif     | 11                                 | 24                     | < 10 <sup>-4</sup>  |
|                              | ABRE binding site motif      | 19                                 | 23                     | < 10 <sup>-9</sup>  |
|                              | ABREATRD22                   | 10                                 | 12                     | < 10 <sup>-5</sup>  |
|                              | CACGTGMOTIF                  | 36                                 | 108                    | < 10 <sup>-10</sup> |
|                              | GADOWNAT                     | 28                                 | 42                     | < 10 <sup>-10</sup> |
|                              | GBOXLERBCS                   | 12                                 | 15                     | < 10 <sup>-6</sup>  |
| Z-box promoter motif         | 8                            | 8                                  | < 10 <sup>-3</sup>     |                     |
| <b>snetFullDT1 at 21 DAF</b> | ABFs binding site motif      | 17                                 | 22                     | < 10 <sup>-8</sup>  |
|                              | ABRE-like binding site motif | 59                                 | 113                    | < 10 <sup>-10</sup> |
|                              | ACGTABREMOTIFA2OSEM          | 52                                 | 89                     | < 10 <sup>-10</sup> |
|                              | CACGTGMOTIF                  | 54                                 | 148                    | < 10 <sup>-10</sup> |
|                              | GADOWNAT                     | 35                                 | 46                     | < 10 <sup>-10</sup> |

|                                 |                              |    |     |           |
|---------------------------------|------------------------------|----|-----|-----------|
|                                 | GBOXLERBCS                   | 16 | 21  | < 10 - 8  |
|                                 | RAV1-B binding site motif    | 21 | 23  | < 10 - 3  |
|                                 | ABRE binding site motif      | 25 | 31  | < 10 - 10 |
|                                 | ABREATRD22                   | 12 | 14  | < 10 - 5  |
|                                 | AtMYC2 BS in RD22            | 51 | 69  | < 10 - 4  |
|                                 | DRE core motif               | 33 | 41  | < 10 - 3  |
|                                 | GBF1/2/3 BS in ADH1          | 10 | 20  | < 10 - 5  |
|                                 | MYCATERD1                    | 51 | 69  | < 10 - 4  |
|                                 | RY-repeat promoter motif     | 10 | 22  | < 10 - 3  |
|                                 | ABFs binding site motif      | 20 | 24  | < 10 - 10 |
|                                 | ABRE-like binding site motif | 74 | 158 | < 10 - 10 |
|                                 | ACGTABREMOTIFA2OSEM          | 67 | 129 | < 10 - 10 |
|                                 | CBF1 BS in cor15a            | 5  | 5   | < 10 - 3  |
|                                 | GADOWNAT                     | 49 | 74  | < 10 - 10 |
|                                 | GBOXLERBCS                   | 19 | 23  | < 10 - 10 |
| <b>snetFullDT2 at<br/>17DAF</b> | RY-repeat promoter motif     | 12 | 26  | < 10 - 3  |
|                                 | ABRE binding site motif      | 32 | 40  | < 10 - 10 |
|                                 | ABREATRD22                   | 18 | 23  | < 10 - 10 |
|                                 | CACGTGMOTIF                  | 56 | 178 | < 10 - 10 |
|                                 | DRE core motif               | 43 | 59  | < 10 - 4  |
|                                 | GBF1/2/3 BS in ADH1          | 10 | 20  | < 10 - 5  |
|                                 | Hexamer promoter motif       | 22 | 25  | < 10 - 3  |
|                                 | Z-box promoter motif         | 18 | 18  | < 10 - 10 |
|                                 | ABFs binding site motif      | 24 | 31  | < 10 - 10 |
|                                 | ABRE-like binding site motif | 78 | 169 | < 10 - 9  |
|                                 | ACGTABREMOTIFA2OSEM          | 72 | 136 | < 10 - 10 |
| <b>snetFullDT2 at<br/>21DAF</b> | CACGTGMOTIF                  | 64 | 192 | < 10 - 10 |
|                                 | GADOWNAT                     | 51 | 72  | < 10 - 9  |
|                                 | GBOXLERBCS                   | 22 | 29  | < 10 - 9  |
|                                 | Z-box promoter motif         | 15 | 15  | < 10 - 6  |

---

|                         |    |    |          |
|-------------------------|----|----|----------|
| ABRE binding site motif | 36 | 47 | < 10 - 9 |
| ABREATRD22              | 19 | 24 | < 10 - 9 |
| AtMYC2 BS in RD22       | 63 | 87 | < 10 - 4 |
| DRE core motif          | 41 | 53 | < 10 - 3 |
| GBF1/2/3 BS in ADH1     | 12 | 24 | < 10 - 6 |
| MYCATERD1               | 63 | 87 | < 10 - 4 |

---

Survey was performed in 1000 bp maximum upstream range cutting off at adjacent genes. Data obtained using the Athena Web tools (<http://www.bioinformatics2.wsu.edu/cgi-bin/Athena/cgi/home.pl>).

**Table S8. Expression pattern of genes related with different process**

| Locus                                      | Description                                   | Fold-change <i>abi3-5/Ler</i> |        |        | Fold-change <i>fus3-3/Col-0</i> |        |        | Fold-change <i>lec1-1/Ws</i> |        |        | Fold-change <i>lec2-1/Ws</i> |        |        | Fold-change <i>abi3-1/Ler</i> |        |        |
|--------------------------------------------|-----------------------------------------------|-------------------------------|--------|--------|---------------------------------|--------|--------|------------------------------|--------|--------|------------------------------|--------|--------|-------------------------------|--------|--------|
|                                            |                                               | 15DAF                         | 17DAF  | 21DAF  | 15DAF                           | 17DAF  | 21DAF  | 15DAF                        | 17DAF  | 21DAF  | 15DAF                        | 17DAF  | 21DAF  | 15DAF                         | 17DAF  | 21DAF  |
| <b>Anthocyanins genes related</b>          |                                               |                               |        |        |                                 |        |        |                              |        |        |                              |        |        |                               |        |        |
| <b>AT5G13930</b>                           | Chalcone and stilbene synthase family protein | 0.966                         | -1.422 | 5.494  | 0.712                           | 5.698  | 2.705  | 1.255                        | 6.341  | 5.668  | 1.7                          | 5.695  | 4.111  | 0.591                         | -4.687 | 1.845  |
| <b>AT5G07990</b>                           | Cytochrome P450 superfamily protein           | -1.12                         | -3.867 | 1.946  | -0.57                           | 1.786  | -0.497 | -0.765                       | 0.413  | 1.655  | -0.708                       | -0.182 | 1.028  | 1.044                         | -2.177 | 0.082  |
| <b>AT5G42800</b>                           | dihydroflavonol 4-reductase                   | -7.402                        | -2.274 | 0.76   | 5.958                           | 5.608  | 0.561  | 0.669                        | 2.321  | 6.845  | 3.837                        | 4.562  | 9.328  | -2.699                        | -1.683 | -4.872 |
| <b>AT3G51240</b>                           | flavanone 3-hydroxylase                       | -1.294                        | -2.573 | 1.404  | -0.78                           | 1.624  | 2.593  | -0.719                       | 1.978  | 1.213  | 0.544                        | 1.301  | 0.97   | 0.432                         | -1.73  | 0.819  |
| <b>AT5G17220</b>                           | glutathione S-transferase phi 12              | -2.315                        | -0.73  | 7.564  | 8.071                           | 10.475 | 5.747  | 8.583                        | 9.782  | 3.074  | 10.62                        | 10.62  | 5.819  | -0.816                        | -4.565 | 0      |
| <b>AT3G29590</b>                           | HXXXD-type acyl-transferase family protein    | 0                             | 0      | 7.073  | 7.763                           | 9.183  | -0.158 | 6.475                        | 8.398  | 7.004  | 8.006                        | 8.006  | 7.299  | 0                             | 0      | 0      |
| <b>AT3G55970</b>                           | jasmonate-regulated gene 21                   | 3.203                         | -4.565 | 4.265  | 3.417                           | 4.729  | 0.395  | 3.827                        | 2.9    | 0      | 6.667                        | 6.667  | 6.616  | 0                             | -4.565 | 4.179  |
| <b>AT4G22880</b>                           | leucoanthocyanidin dioxygenase                | -3.109                        | 3.835  | 6.704  | 5.465                           | 9.275  | 1.572  | 3.502                        | 8.963  | 1.292  | 5.726                        | 9.922  | 3.575  | -6.312                        | 0      | 0      |
| <b>AT1G66390</b>                           | myb domain protein 90                         | 3.203                         | 3.835  | 3.776  | 3.798                           | 1.158  | 1.1    | 6.324                        | 1.868  | 5.583  | 8.72                         | 3.492  | 9.092  | 3.756                         | 0      | -3.92  |
| <b>AT5G54060</b>                           | UDP-glucose:flavonoid 3-o-glucosyltransferase | 0                             | 0      | 7.469  | 7.4                             | 8.895  | 3.669  | 8                            | 10.17  | 7.214  | 10.101                       | 10.101 | 8.625  | 3.756                         | 0      | 0      |
| <b>AT4G14090</b>                           | UDP-Glycosyltransferase superfamily protein   | 0.936                         | 0.744  | 3.444  | 1.458                           | 4.488  | 1.957  | 1.71                         | 4.596  | 1.499  | 3.167                        | 4.393  | 2.055  | -1.234                        | -2.093 | 0.588  |
| <b>AT5G49690</b>                           | UDP-Glycosyltransferase superfamily protein   | 1.784                         | 6.209  | -1.252 | 4.745                           | -2.571 | -0.314 | 1.295                        | -0.686 | -1.445 | 4.524                        | 0.526  | -0.495 | 0.147                         | 7.365  | 0.44   |
| <b>Chlorophyll synthesis genes related</b> |                                               |                               |        |        |                                 |        |        |                              |        |        |                              |        |        |                               |        |        |
| <b>AT1G08520</b>                           | ALBINA 1                                      | 2.582                         | 3.87   | 3.116  | 2.512                           | 1.463  | 0.512  | 9.278                        | 5.347  | 2.842  | 9.261                        | 4.995  | 1.667  | 0.477                         | 0.431  | -1.04  |
| <b>AT1G69740</b>                           | Aldolase superfamily protein                  | 1.48                          | 0.909  | 1.642  | 1.674                           | 1.472  | 2.122  | 1.92                         | 1.926  | 0.684  | 1.083                        | 1.375  | 0.069  | 0.347                         | -0.638 | 0.339  |
| <b>AT1G03475</b>                           | Coproporphyrinogen III oxidase                | 0.666                         | 0.922  | 1.653  | 1.897                           | 1.673  | 1.056  | 1.534                        | 1.948  | 0.493  | 0.897                        | 1.423  | -0.251 | -0.486                        | 0.826  | 0.089  |
| <b>AT3G56940</b>                           | dicarboxylate diiron protein, putative (Crd1) | 1.927                         | 2.314  | 7.571  | 1.559                           | 6.11   | 2.684  | 4.667                        | 6.078  | 5.899  | 5.307                        | 5.513  | 5.97   | 0.658                         | -4.339 | 0.684  |
| <b>AT3G59400</b>                           | enzyme binding;tetrapyrrole binding           | 1.093                         | 1.598  | 3.152  | 0.181                           | 6.445  | 2.991  | 7.57                         | 8.425  | 6.462  | 8.623                        | 8.623  | 7.686  | -0.947                        | -5.534 | 1.218  |
| <b>AT2G30390</b>                           | ferrochelatase 2                              | 1.581                         | 1.468  | 3.169  | 1.121                           | 1.884  | 0.087  | 0.941                        | 1.177  | 0.882  | 1.013                        | 1.201  | 0.841  | 1.229                         | 0.587  | 0.271  |
| <b>AT1G48520</b>                           | GLU-ADT subunit B                             | 1.865                         | 3.007  | 2.294  | 2.729                           | 2.45   | 0.034  | 1.714                        | -0.357 | 0.854  | -0.22                        | -0.614 | 0.918  | 0.892                         | 1.64   | 0.082  |
| <b>AT3G48730</b>                           | glutamate-1-semialdehyde 2,1-aminomutase 2    | 1.871                         | 2.131  | 2.776  | 3.442                           | 2.443  | 2.221  | 3.658                        | 4.595  | 1.614  | 1.955                        | 2.821  | 0.39   | -0.183                        | 0.246  | 0.376  |
| <b>AT5G63570</b>                           | glutamate-1-semialdehyde-2,1-aminomutase      | 0.99                          | 1.086  | 1.573  | 3.187                           | 2.275  | 0.68   | 2.541                        | 2.35   | 1.356  | 1.41                         | 1.069  | 0.503  | -0.091                        | 0.334  | 0.254  |
| <b>AT1G58290</b>                           | Glutamyl-tRNA reductase family protein        | 1.437                         | 3.427  | 3.756  | 1.25                            | 8.432  | 1.542  | 5.787                        | 4.925  | 4.986  | 5.458                        | 4.426  | 5.345  | -0.686                        | -1.109 | -4.872 |
| <b>AT2G26550</b>                           | heme oxygenase 2                              | 0.982                         | 5.757  | 1.717  | 2.398                           | 0.727  | -0.162 | 1.73                         | 7.787  | 2.685  | -1.168                       | 5.546  | 2.283  | 0.517                         | 5.965  | -5.847 |
| <b>AT5G08280</b>                           | hydroxymethylbilane synthase                  | 1.707                         | 1.794  | 2.497  | 2.658                           | 1.035  | 3.219  | 2.56                         | 4.324  | 1.373  | 1.378                        | 2.711  | 0.282  | -0.744                        | 0.681  | 0.422  |
| <b>AT5G45930</b>                           | magnesium chelatase i2                        | 2.087                         | 4.783  | 8      | 2.626                           | 7.563  | 6.156  | 7.393                        | 7.654  | 6.348  | 5.546                        | 5.546  | 5.915  | -4.549                        | 0      | 0      |

|                  |                                                                                                           |        |       |        |       |        |       |       |       |        |       |        |        |        |        |        |
|------------------|-----------------------------------------------------------------------------------------------------------|--------|-------|--------|-------|--------|-------|-------|-------|--------|-------|--------|--------|--------|--------|--------|
| <b>AT5G13630</b> | magnesium-chelatase subunit chlH, chloroplast, putative / Mg-protoporphyrin IX chelatase, putative (CHLH) | 0.869  | 2.169 | 10.135 | 0.663 | 7.767  | 0.532 | 4.011 | 9.884 | 4.951  | 5.553 | 9.749  | 6.385  | 0.597  | -6.518 | 0      |
| <b>AT4G25080</b> | magnesium-protoporphyrin IX methyltransferase                                                             | 1.714  | 2.51  | 2.781  | 1.22  | 1.977  | 2.273 | 3.528 | 4.141 | 1.606  | 2.595 | 3.295  | 0.939  | 0.637  | -3.436 | 0.274  |
| <b>AT5G18660</b> | NAD(P)-binding Rossmann-fold superfamily protein                                                          | 1.892  | 3.03  | 9.36   | 1.623 | 9.191  | 3.342 | 3.585 | 5.846 | 8.857  | 2.202 | 4.39   | 7.568  | -0.161 | -4.565 | 0      |
| <b>AT4G18480</b> | P-loop containing nucleoside triphosphate hydrolases superfamily protein                                  | 1.44   | 1.604 | 10.468 | 1.898 | 4.672  | 3.485 | 9.685 | 9.923 | 3.056  | 9.102 | 9.102  | 3.083  | -0.423 | -1.928 | 0      |
| <b>AT5G54190</b> | protochlorophyllide oxidoreductase A                                                                      | -0.427 | 0.913 | 5.792  | 4.909 | 4.509  | 8.82  | 3.292 | 6.173 | 3.849  | 4.27  | 4.27   | 4.806  | -4.549 | -5.534 | -4.872 |
| <b>AT4G27440</b> | protochlorophyllide oxidoreductase B                                                                      | 2.405  | 4.195 | 8.658  | 2.528 | 6.791  | 1.84  | 4.83  | 6.372 | 3.438  | 5.545 | 5.732  | 4.203  | -2.23  | -1.127 | 2.515  |
| <b>AT1G03630</b> | protochlorophyllide oxidoreductase C                                                                      | 3.141  | 6.209 | 9.523  | 3.499 | 8.378  | 4.128 | 8.229 | 3.696 | 3.513  | 8.688 | 3.46   | 3.995  | 1.093  | 4.425  | 4.179  |
| <b>AT5G63290</b> | Radical SAM superfamily protein                                                                           | 0.28   | 5.924 | -0.218 | 1.342 | -1.803 | 1.797 | 6.674 | 5.721 | -0.908 | 5.804 | 5.804  | -0.739 | 0.561  | 6.953  | -0.308 |
| <b>AT1G45110</b> | Tetrapyrrole (Corrin/Porphyrin) Methylases                                                                | 2.042  | 1.359 | 1.878  | 0.721 | 1.296  | 3.064 | 5.862 | 2.144 | 0.34   | 3.343 | -0.924 | -0.093 | 0.147  | -4.565 | 2.197  |
| <b>AT3G14110</b> | Tetratricopeptide repeat (TPR)-like superfamily protein                                                   | 1.341  | 1.313 | 0.998  | 1.813 | 2.153  | 2.763 | 2.142 | 3.212 | 2.05   | 1.152 | 1.431  | 0.928  | -0.237 | -0.435 | 0.518  |
| <b>AT3G51820</b> | UbiA prenyltransferase family protein                                                                     | 1.843  | 1.889 | 4.334  | 2.623 | 2.47   | 1.87  | 3.153 | 4.349 | 2.71   | 3.688 | 4.596  | 2.65   | 0.847  | -1.354 | 0.052  |
| <b>AT2G40490</b> | Uroporphyrinogen decarboxylase                                                                            | 0.925  | 0.226 | 2.773  | 2.039 | 0.764  | 1.483 | 1.112 | 3.005 | 1.531  | 0.623 | 1.658  | 0.601  | -0.573 | -2.288 | 0.398  |
| <b>AT3G14930</b> | Uroporphyrinogen decarboxylase                                                                            | 0.514  | 0.359 | 2.934  | 1.504 | 1.665  | 1.052 | 1.369 | 2.435 | 1.388  | 0.915 | 1.452  | 0.976  | 0.293  | -0.386 | 1.195  |

### Leaf development genes related

|                  |                                                                                     |        |        |       |        |       |        |        |        |        |        |        |        |        |        |       |
|------------------|-------------------------------------------------------------------------------------|--------|--------|-------|--------|-------|--------|--------|--------|--------|--------|--------|--------|--------|--------|-------|
| <b>AT1G63650</b> | basic helix-loop-helix (bHLH) DNA-binding superfamily protein                       | 0.541  | 6.743  | 6.863 | 0.394  | 1.965 | -0.158 | 1.257  | 2.059  | 6.224  | -0.113 | 0.794  | 0      | -5.518 | 0      | 0     |
| <b>AT5G41315</b> | basic helix-loop-helix (bHLH) DNA-binding superfamily protein                       | 0      | 0      | 5.226 | 2.106  | 0.512 | -1.667 | 4.522  | 0      | 5.583  | 3.343  | 3.343  | 0      | 0      | 0      | 0     |
| <b>AT1G79840</b> | HD-ZIP IV family of homeobox-leucine zipper protein with lipid-binding START domain | 1.386  | 0.34   | 1.703 | 0.893  | 1.697 | 3.361  | 3.539  | 5.366  | 2.42   | 2.373  | 3.373  | 1.252  | 0.012  | -1.579 | 0.362 |
| <b>AT3G61150</b> | homeodomain GLABROUS 1                                                              | -0.034 | -1.052 | 1.126 | 1.524  | 0.607 | 0.54   | -0.064 | 7.869  | 1.404  | -2.276 | 5.546  | 0.493  | 0.158  | -1.94  | 1.269 |
| <b>AT1G17920</b> | homeodomain GLABROUS 12                                                             | -1.231 | 3.835  | 5.948 | 2.242  | 5.408 | 1.572  | 5.625  | -0.481 | 3.305  | 0      | -5.228 | -0.48  | -1.61  | 0      | 4.179 |
| <b>AT1G05230</b> | homeodomain GLABROUS 2                                                              | -1.03  | 0.12   | 1.5   | 0.585  | 0.548 | 0.866  | 7.466  | 0.901  | 0.892  | 7.11   | 0.102  | 0.926  | -0.162 | 0.215  | 0.969 |
| <b>AT2G46410</b> | Homeodomain-like superfamily protein                                                | 4.122  | 4.385  | 3.717 | 3.417  | 5.868 | 5.581  | 1.295  | 6.173  | 2.426  | -0.854 | 3.343  | -0.48  | 3.756  | 4.425  | 5.138 |
| <b>AT5G53200</b> | Homeodomain-like superfamily protein                                                | 4.679  | 4.385  | 2.822 | -0.32  | 5.295 | -1.043 | 1.168  | 1.266  | 5.366  | 0.39   | 1.28   | 0      | 3.756  | 0      | 0     |
| <b>AT5G11060</b> | KNOTTED1-like homeobox gene 4                                                       | -0.427 | -0.73  | 5.443 | 4.348  | 0.327 | -2.103 | 5.342  | 1.771  | 2.931  | 7.203  | 2.936  | 3.495  | 0.719  | 0.826  | 0     |
| <b>AT4G08150</b> | KNOTTED-like from Arabidopsis thaliana                                              | 3.141  | 7.595  | 4.01  | 6.294  | 0.014 | -0.161 | 5.862  | 1.068  | -0.237 | 5.546  | 0.318  | -0.997 | 1.093  | 4.425  | 2.197 |
| <b>AT3G27920</b> | myb domain protein 0                                                                | 0      | 0      | 2.822 | 2.898  | 2.883 | 0      | 4.522  | 0      | 4.4    | 4.27   | 4.27   | 0      | 0      | 0      | 0     |
| <b>AT2G26580</b> | plant-specific transcription factor YABBY family protein                            | 1.299  | -1.321 | 6.786 | -2.365 | 7.237 | -0.809 | -0.212 | 1.08   | 6.666  | -1.423 | -0.504 | 6.258  | 0.081  | -2.272 | 0     |
| <b>AT2G45190</b> | Plant-specific transcription factor YABBY family protein                            | -0.094 | -0.357 | 3.253 | -1.838 | 2.389 | 0.112  | -0.766 | 1.04   | 4.376  | -1.039 | 0.132  | 3.687  | 0.183  | -1.589 | -5.44 |

### Antioxidants genes related

|                  |                                                                    |        |        |        |        |        |        |        |        |        |        |        |        |        |        |        |
|------------------|--------------------------------------------------------------------|--------|--------|--------|--------|--------|--------|--------|--------|--------|--------|--------|--------|--------|--------|--------|
| <b>AT1G67600</b> | Acid phosphatase/vanadium-dependent haloperoxidase-related protein | -0.86  | -2.261 | -4.882 | -2.899 | -2.986 | -2.333 | -1.817 | -3.045 | -4.31  | -0.296 | -1.047 | -1.214 | -0.738 | 0.852  | -0.189 |
| <b>AT1G08570</b> | atypical CYS HIS rich thioredoxin 4                                | -1.269 | -2.709 | -1.996 | -2.309 | -2.894 | -1.258 | -2.593 | -2.05  | -2.004 | -0.263 | -0.864 | -1.189 | -0.46  | -0.946 | 0.396  |
| <b>AT1G20630</b> | catalase 1                                                         | -0.943 | -1.576 | -1.875 | -0.87  | -0.406 | -2.861 | -2.153 | -2.638 | -1.182 | -0.583 | -0.705 | -0.283 | -0.056 | -0.126 | -0.081 |

|                  |                                                                                                    |        |        |        |        |        |        |        |        |        |        |        |        |        |        |        |
|------------------|----------------------------------------------------------------------------------------------------|--------|--------|--------|--------|--------|--------|--------|--------|--------|--------|--------|--------|--------|--------|--------|
| <b>AT4G35090</b> | catalase 2                                                                                         | 2.202  | 2.12   | 0.111  | 1.997  | -1.167 | 1.314  | 0.54   | 0.331  | -1.24  | 1.249  | 0.387  | -0.815 | 0.195  | 0.6    | 0.547  |
| <b>AT1G08830</b> | copper/zinc superoxide dismutase 1                                                                 | -0.5   | -0.151 | -0.277 | -4.661 | -1.978 | -3.23  | -1.353 | -2.297 | -0.587 | -0.543 | -0.588 | -0.616 | -1.028 | 0.296  | -0.512 |
| <b>AT2G28190</b> | copper/zinc superoxide dismutase 2                                                                 | -1.529 | -0.886 | -1.636 | -7.577 | -6.414 | -4.189 | -3.327 | -3.465 | -2.001 | -0.201 | -0.67  | -0.761 | -1.435 | -0.092 | -0.108 |
| <b>AT5G18100</b> | copper/zinc superoxide dismutase 3                                                                 | 0.658  | 0.993  | -2.974 | -1.387 | -1.088 | 0.6    | 0.322  | -0.539 | -0.784 | 0.517  | -0.42  | -0.828 | -0.517 | 1.137  | -1.262 |
| <b>AT3G63080</b> | glutathione peroxidase 5                                                                           | 0.309  | 0.12   | -0.295 | -1.679 | -0.463 | -0.624 | -0.403 | 0.006  | -0.866 | -0.087 | 0.604  | 0.026  | 0.389  | 0.01   | -0.19  |
| <b>AT4G31870</b> | glutathione peroxidase 7                                                                           | -4.549 | -6.109 | -3.342 | -2.8   | -4.409 | -1.667 | -1.864 | -2.849 | -3.053 | 1.224  | -0.819 | -1.988 | -0.793 | 1.065  | 0.943  |
| <b>AT2G18950</b> | homogentisate phytyltransferase 1                                                                  | -0.684 | -0.77  | 2.659  | -1.373 | 1.554  | -2.036 | -0.197 | -0.805 | 1.636  | 0.398  | 0.155  | 2.317  | 0.159  | -0.991 | -1.262 |
| <b>AT3G56350</b> | Iron/manganese superoxide dismutase family protein                                                 | -8.603 | -7.674 | -8.801 | -3.198 | -3.207 | -1.255 | -2.686 | -2.647 | -2.818 | -0.155 | -0.29  | -1.221 | -0.549 | -0.413 | -0.572 |
| <b>AT1G54870</b> | NAD(P)-binding Rossmann-fold superfamily protein                                                   | -5.222 | -6.019 | -8.25  | -2.15  | -3.945 | -2.077 | -3.71  | -3.928 | -2.984 | 0.036  | -0.956 | -1.236 | -0.381 | 0.969  | 0.277  |
| <b>AT1G68850</b> | Peroxidase superfamily protein                                                                     | -1.147 | -1.758 | -1.155 | 0.442  | 5.295  | -7.184 | -1.153 | -1.871 | 0      | -1.005 | -1.079 | 0      | 0.245  | 0.338  | -4.872 |
| <b>AT1G71695</b> | Peroxidase superfamily protein                                                                     | -0.073 | -1.647 | -0.108 | -2.793 | 1.65   | -1.417 | -1.445 | -0.651 | 1.903  | -0.985 | 0.186  | 1.138  | 0.021  | -2.858 | -0.198 |
| <b>AT1G77100</b> | Peroxidase superfamily protein                                                                     | 1.688  | 2.071  | -0.82  | 0.682  | 1.697  | -3.322 | -0.293 | -0.433 | 0.997  | 0.989  | 0.097  | 2.2    | -0.272 | 3.465  | -1.493 |
| <b>AT2G38380</b> | Peroxidase superfamily protein                                                                     | -1.569 | -3.705 | -2.879 | -0.247 | 2.191  | -7.233 | -1.203 | -1.926 | -5.6   | -1.176 | -1.365 | 0.658  | 0.054  | -0.897 | -0.443 |
| <b>AT3G01420</b> | Peroxidase superfamily protein                                                                     | -1.991 | -2.541 | -2.819 | -0.207 | 1.324  | -6.64  | -1.665 | -2.748 | 1.292  | -0.431 | -0.877 | 2.543  | -0.384 | -0.126 | -1.878 |
| <b>AT4G21960</b> | Peroxidase superfamily protein                                                                     | 0.645  | -0.009 | 3.452  | -2.245 | 3.62   | -0.947 | -1.525 | -0.096 | 4.365  | -0.684 | 0.39   | 3.998  | -0.261 | -1.858 | -1.237 |
| <b>AT4G25980</b> | Peroxidase superfamily protein                                                                     | -3.003 | -4.361 | 4.265  | -4.026 | 5.868  | -6.262 | -0.924 | 1.137  | -1.181 | -2.871 | 1.081  | -0.533 | -0.037 | -3.616 | 0      |
| <b>AT4G37520</b> | Peroxidase superfamily protein                                                                     | -1.912 | -2.385 | -3.025 | -2.475 | 0.038  | -6.297 | -1.733 | -2.06  | 0      | -0.918 | -0.491 | 2.677  | -0.266 | 0.158  | -5.847 |
| <b>AT4G37530</b> | Peroxidase superfamily protein                                                                     | -3.609 | -6.109 | 0      | -3.794 | 5.295  | -8.304 | -2.951 | -2.307 | 0      | -2.895 | -2.648 | 0      | -3.609 | -6.109 | 0      |
| <b>AT5G42180</b> | Peroxidase superfamily protein                                                                     | -1.725 | -0.73  | -3.92  | -0.024 | 4.893  | -7.048 | -0.971 | -1.15  | 2.946  | -3.176 | -1.939 | 0      | -0.597 | 2.388  | -3.92  |
| <b>AT2G23240</b> | Plant EC metallothionein-like protein, family 15                                                   | -0.447 | -2.275 | -7.786 | 0.911  | -3.732 | 2.328  | -2.867 | -3.17  | -3.118 | 0.611  | -1.223 | -1.53  | 0.421  | 2.288  | -0.303 |
| <b>AT2G42000</b> | Plant EC metallothionein-like protein, family 15                                                   | -0.802 | -2.61  | -6.861 | -2.642 | -4.001 | -0.87  | -1.367 | -2.424 | -1.678 | 0.302  | -1.076 | -0.683 | -0.566 | 0.951  | -0.633 |
| <b>AT1G45145</b> | thioredoxin H-type 5                                                                               | 0.384  | -0.587 | -1.606 | -1.153 | -1.387 | 1.749  | 0.226  | -0.856 | -0.9   | 0.487  | -0.494 | -0.678 | 0.159  | 1.3    | 0.514  |
| <b>AT4G32770</b> | tocopherol cyclase, chloroplast / vitamin E deficient 1 (VTE1) / sucrose export defective 1 (SXD1) | -1.269 | -2.247 | -1.078 | -1.735 | 0.024  | -2.699 | -1.343 | -1.635 | -0.595 | -0.367 | -0.398 | -0.171 | 0.128  | -1.351 | -0.386 |

### DNA repair genes related

|                  |                                     |        |        |        |        |        |        |        |        |        |        |        |        |        |       |        |
|------------------|-------------------------------------|--------|--------|--------|--------|--------|--------|--------|--------|--------|--------|--------|--------|--------|-------|--------|
| <b>AT3G50880</b> | DNA glycosylase superfamily protein | -0.32  | -0.897 | -1.825 | -1.429 | -1.191 | -0.834 | -1.116 | -1.236 | -0.666 | -0.554 | -0.904 | -0.299 | 0.318  | 0.143 | 0.439  |
| <b>AT5G16630</b> | DNA repair protein Rad4 family      | -0.085 | 1.027  | -1.403 | 0.44   | -4.209 | -1.667 | 0.021  | -1.423 | -1.763 | 1.394  | 0.103  | -1.198 | 0.348  | 2.301 | -0.521 |
| <b>AT1G48620</b> | high mobility group A5              | -0.488 | -0.236 | -2.058 | 0.419  | -0.678 | -1.001 | -0.903 | -0.711 | -0.874 | 0.477  | 0.203  | -0.182 | -0.223 | 0.99  | 0.213  |
| <b>AT1G08170</b> | Histone superfamily protein         | -6.957 | -6.929 | -7.996 | -2.374 | -6.475 | -1.465 | -4.463 | -4.945 | -4.802 | 1.762  | -0.614 | -2.164 | -0.297 | 0.278 | 0.036  |
| <b>AT3G27360</b> | Histone superfamily protein         | -1.764 | -0.768 | -2.97  | -1.749 | -1.912 | -0.077 | 0.041  | -0.373 | -1.104 | -0.505 | -0.497 | -0.421 | -1.741 | 2.433 | 0.137  |
| <b>AT5G63190</b> | MA3 domain-containing protein       | 0.071  | 0.121  | -1.628 | 1.716  | -1.129 | -0.753 | -0.272 | -0.784 | -0.6   | 0.226  | -0.396 | -0.98  | -0.336 | 0.867 | 0.301  |
| <b>AT4G29170</b> | Mnd1 family protein                 | 1.677  | -0.185 | -3.471 | 1.957  | -1.19  | 1.705  | 6.243  | 0.406  | -1.754 | 5.232  | -0.977 | -0.926 | 0.719  | 1.065 | 0.274  |
| <b>AT1G58060</b> | RNA helicase family protein         | -1.711 | 1.508  | -0.938 | -0.946 | 4.332  | -3.379 | -1.146 | -1.15  | -0.046 | -0.113 | -0.186 | -1.322 | -0.565 | -0.14 | 0.271  |

**Table S9. Genes and T-DNA insertion seeds (SALK Line) examined from the snetFullDT1 and snetFullDT2 for seed germination phenotypes**

| <b>Locus</b>     | <b>Aliases</b> | <b>Description</b>                                                            | <b>SALK lines</b>          |
|------------------|----------------|-------------------------------------------------------------------------------|----------------------------|
| <b>AT1G21000</b> | PLATZ1         | PLATZ transcription factor family protein                                     | SALK_005374                |
| <b>AT1G76590</b> | PLATZ2         | PLATZ transcription factor family protein                                     | SALK_016183                |
| <b>AT4G26050</b> | PIRL8          | plant intracellular ras group-related LRR 8                                   | SALK_001827                |
| <b>AT1G01720</b> | ATAF1          | NAC (No Apical Meristem) domain transcriptional regulator superfamily protein | SALK_067648                |
| <b>AT2G47180</b> | GOLS1          | galactinol synthase 1                                                         | SALK_013103<br>SALK_121059 |
| <b>AT1G56600</b> | GOLS2          | galactinol synthase 2                                                         | SALK_075769<br>SALK_101144 |
| <b>AT1G77950</b> | AGL67          | AGAMOUS-like 67                                                               | SALK_050367<br>SALK_013790 |
| <b>AT5G01670</b> | NRS1           | NAD(P)-linked oxidoreductase superfamily protein                              | SALK_150592<br>SALK_111609 |
| <b>AT4G01970</b> | STS            | stachyose synthase                                                            | SALK_021300                |
| <b>AT1G01250</b> | ERF23          | Integrase-type DNA-binding superfamily protein                                | SALK_044761                |
| <b>AT1G75490</b> | DREB2D         | Integrase-type DNA-binding superfamily protein                                | SALK_023056                |
| <b>AT3G54510</b> | ERD4           | Early-responsive to dehydration stress protein (ERD4)                         | SALK_055548                |
| <b>AT4G04840</b> | MSRB6          | methionine sulfoxide reductase B6                                             | SALK_039712                |
| <b>AT2G19320</b> |                | unknown protein                                                               | SALK_092667                |
| <b>AT5G54070</b> | HSF9           | heat shock transcription factor A9                                            | SALK_063950                |
| <b>AT1G05510</b> | OBAP1A         | OBAP1A, oil body-associated protein 1A                                        | SALK_017397<br>SALK_011689 |

**Table S10. Primers used in this study**

| <b>Primers</b>               | <b>5'-3'</b>                                                                                                           |
|------------------------------|------------------------------------------------------------------------------------------------------------------------|
| <b>Genotyping SALK lines</b> |                                                                                                                        |
| <b>SALK_005374</b>           | Fw TGATTGTGGTTTTTCGATAGCC<br>Rv CACGTTAAGTAACGTGGCAGC                                                                  |
| <b>SALK_016183</b>           | Fw ATCATGAGCATTTCAAATGCC<br>Rv GAATGAAGCGTGATCCAAGTC                                                                   |
| <b>SALK_001827</b>           | Fw ACCATTTGATTCCGGCCTATTC<br>Rv TTTGAGTTGACGGAGAGCTTC                                                                  |
| <b>SALK_067648</b>           | Fw TCCCAGGGACAGAAAATATCC<br>Rv AAATATTAATTGATTGCGGCAC                                                                  |
| <b>SALK_013103</b>           | Fw TTCGAAACAAAAATTGAACCG<br>Rv TTGTTTGACCTACCAGATGG                                                                    |
| <b>SALK_121059</b>           | Fw ATGAATGTATGTTTCGCAGGC<br>Rv TTGTTTGACCTACCAGATGG                                                                    |
| <b>SALK_075769</b>           | Fw TCATAGACTTGATTGGTTTCCG<br>Rv AACAACACAGCCTTGATCCAC                                                                  |
| <b>SALK_101144</b>           | Fw TCATAGACTTGATTGGTTTCCG<br>Rv AACAACACAGCCTTGATCCAC                                                                  |
| <b>SALK_050367</b>           | Fw AAAGGTATCGGATGTTTTCCG<br>Rv TTGGTAACAGCTTATGGACCC                                                                   |
| <b>SALK_013790</b>           | Fw TACAGTCCAGAAGCCACCAAC<br>Rv ATTTCTCGTGGCAACGTTATG                                                                   |
| <b>LB3.1</b>                 | ATTTTGCCGATTTTCGGAAC                                                                                                   |
| <b>cDNA (CDS)</b>            |                                                                                                                        |
| <b>PLATZ1</b>                | Fw GGGGACAAGTTTGTACAAAAAAGCAGGCTTCATGATAAGAACAGAGGAAGAAGAAGA<br>Rv GGGGACCACTTTGTACAAGAAAGCTGGGTCTTAGAACGGAGCACGGTGAG  |
| <b>PLATZ2</b>                | Fw GGGGACAAGTTTGTACAAAAAAGCAGGCTTCATGGGACCGATGATGATGAGAGC<br>Rv GGGGACCACTTTGTACAAGAAAGCTGGGTCTTAGAAAGGAGCACGGTGTGGGA  |
| <b>AGL67</b>                 | Fw GGGGACAAGTTTGTACAAAAAAGCAGGCTTCATGGGTCTGGGTTAAATTGGAGT<br>Rv GGGGACCACTTTGTACAAGAAAGCTGGGTCTCATTGTTGGATTTTGGTTCCGAA |
| <b>DREB2G</b>                | Fw GGGGACAAGTTTGTACAAAAAAGCAGGCTTCATGGAAGAAGAGCAACCTCCG<br>Rv GGGGACCACTTTGTACAAGAAAGCTGGGTCTCAGAACCAATTCCATGGATGTTGA  |
| <b>DREB2D</b>                | Fw GGGGACAAGTTTGTACAAAAAAGCAGGCTTCACATGTCATCCATAGAGCCAAA<br>Rv GGGGACCACTTTGTACAAGAAAGCTGGGTCTGACACCTCAAAGTGGGGA       |
| <b>Real Time PCR</b>         |                                                                                                                        |
| <b>ABI5</b>                  | Fw AAACATGCATTGGCGGAGTT<br>Rv TCAATGTCCGCAATCTCCCG                                                                     |
| <b>ATAF1</b>                 | Fw TCAGGCTGGATGATTGGGTT<br>Rv GGCGGAGGCATAACCATCTC                                                                     |
| <b>UGE3</b>                  | Fw GGAGCTCACGAGAGTGGAAG<br>Rv CTAACCGCGCTACCATCCAT                                                                     |
| <b>TTP5</b>                  | Fw GCCAAAGAGCTTATGGAACACC<br>Rv CCTTTGTTACACCCTGTGG                                                                    |
| <b>LEA4</b>                  | Fw GAGAAACGCGTCAGCACAAC<br>Rv ATCTGATGTGTCCCAGTGCC                                                                     |
| <b>ChiADR</b>                | Fw CCAATTGAAGTGGCACCATCC<br>Rv CCACAGCTCCTCATTAGGG                                                                     |
| <b>PLATZ2</b>                | Fw TCGGCAAAGGAGTCACCAAT<br>Rv TCCTCCAAGTTTGCAACCGA                                                                     |
| <b>ABI3</b>                  | Fw GAACACCGGCGATTTTGTGA                                                                                                |



---

|               |                                                      |
|---------------|------------------------------------------------------|
|               | Rv TTTTGTCCGCTCGGTTGTCT                              |
| <b>GOLS1</b>  | Fw GTGTACAATCTCGTCCTTGCG<br>Rv AACCCGCTGCACAGTAGTGA  |
| <b>PLATZ1</b> | Fw TGCAAGCTTGGAGGAATGAGG<br>Rv AGCTTCATCTGATTCCGACCC |
| <b>UBQ10</b>  | Fw GCGTCTTCGTGGTGGTTTCTA<br>Rv GTCGAGTCACTTTGCAGGC   |
| <b>TIP4L</b>  | Fw AGTCATGCCAAGCTCATGGT<br>Rv TCAACTGGATACCCTTTGCA   |

---

**a**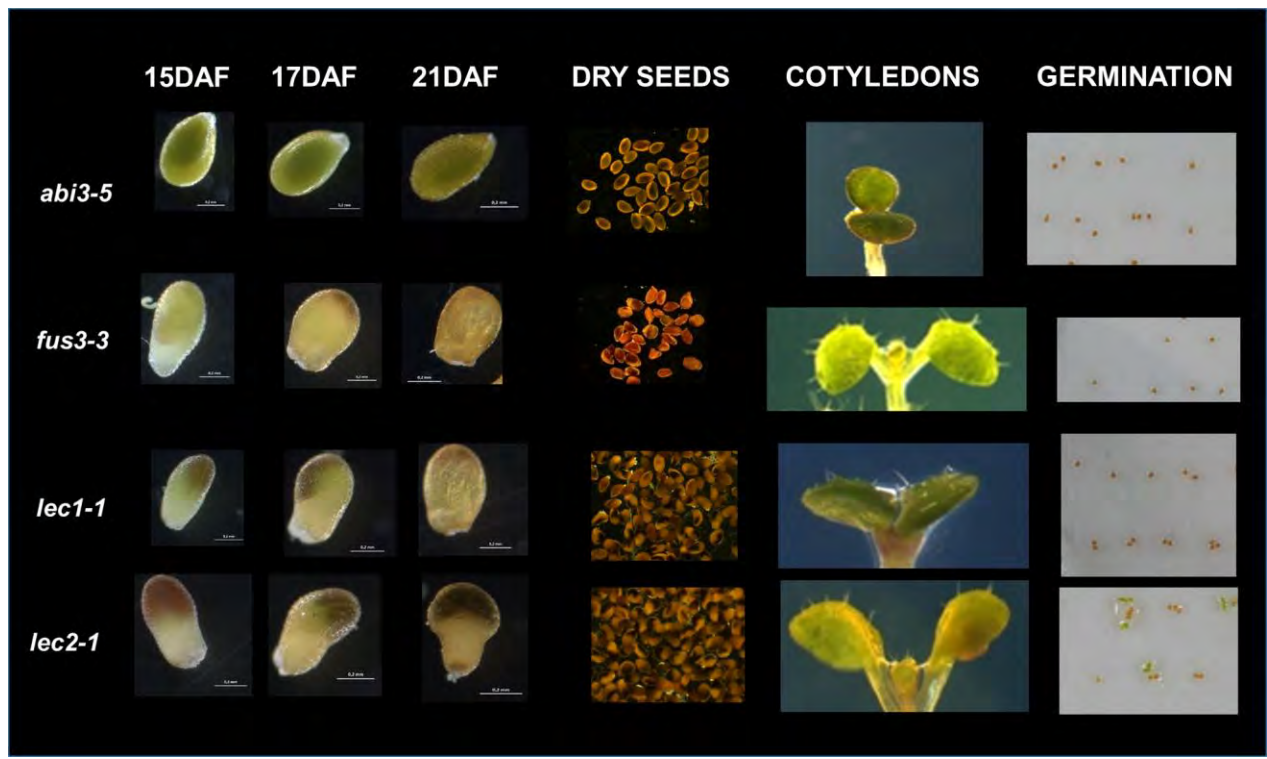**b**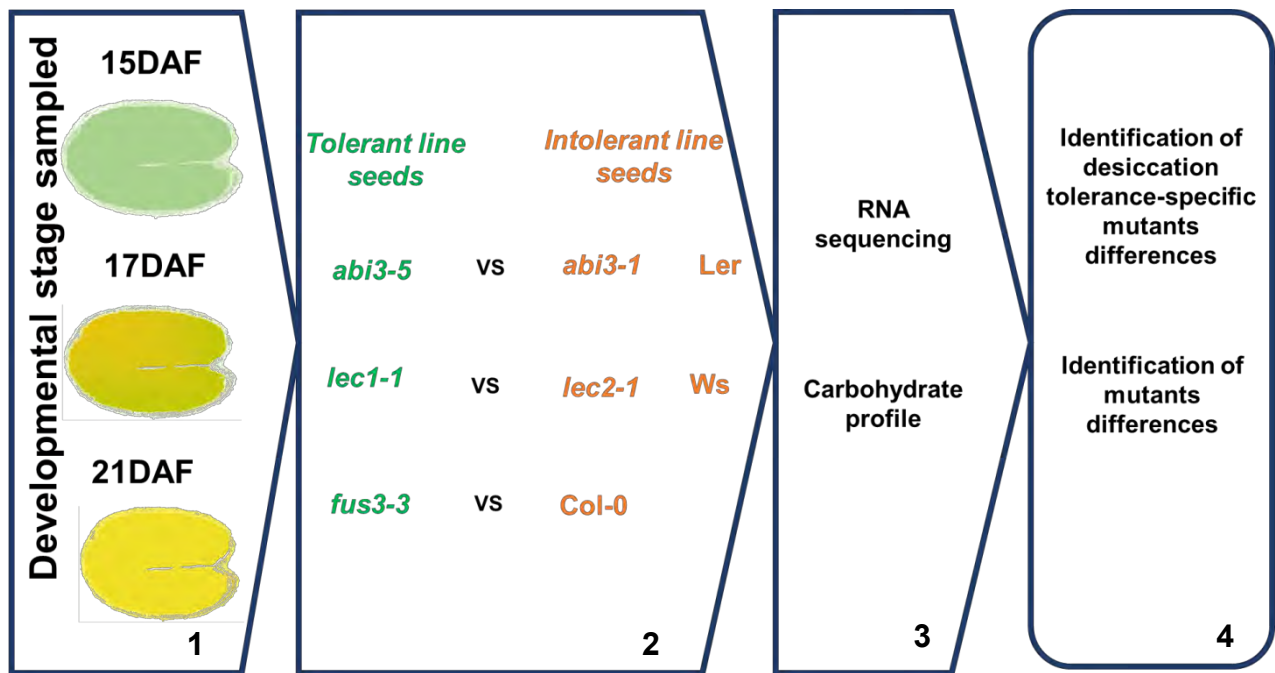

**Figure S1. Phenotype of the different lines and general strategy used in the work.** (a) Seed phenotypes of each mutant at 15,17 ,21 DAF, dry seeds, trichome cotyledons and germination. (b) General approach used to identify desiccation tolerance differences. 1) Seeds were sampled at 15, 17 and 21DAF 2) Different lines: desiccation intolerant mutants, tolerant mutants and wildtypes were collected. Contrasts were performed tolerant line seeds vs intolerant line seeds at 15, 17 and 21 DAF. 3) RNA sequencing and carbohydrate profiles were performed from each lines sampled. 4) To RNA sequencing, the DT-specific differences were identified by generalized linear model and to carbohydrates analysis, the DT-specific differences were identified by pair comparison (mutant vs wildtype)

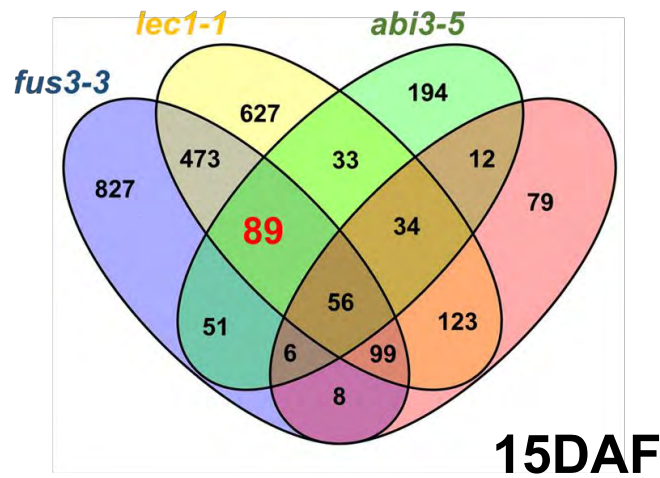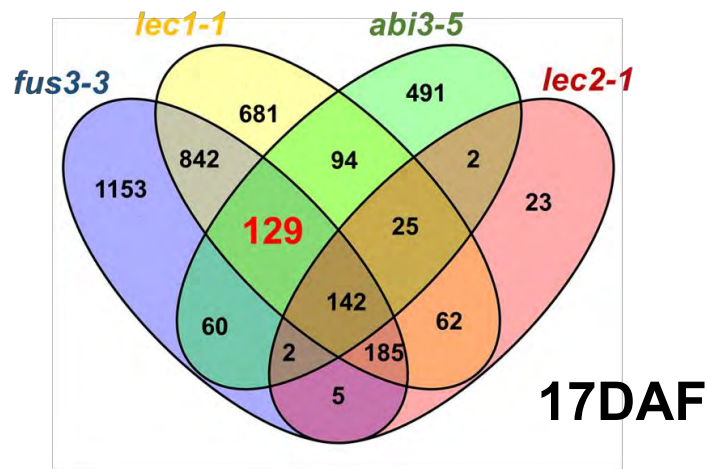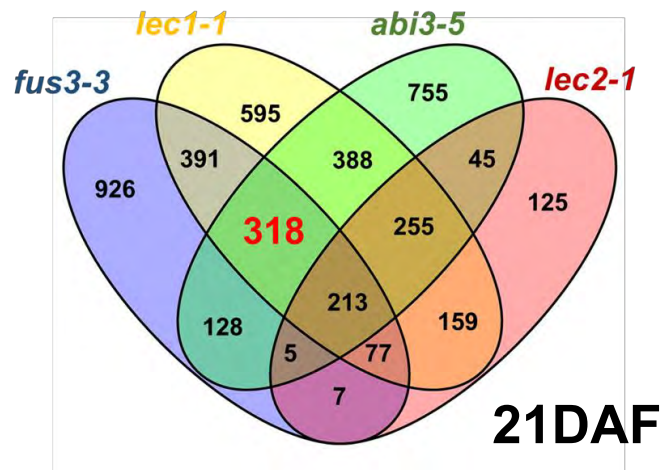

**Figure S2. Venn diagrams of upregulated genes.** Venn diagrams showing the number and distribution of differentially upregulate genes across the tested mutants lines at 15, 17 and 21 DAF, respectively. The number of shared genes is indicated in red.



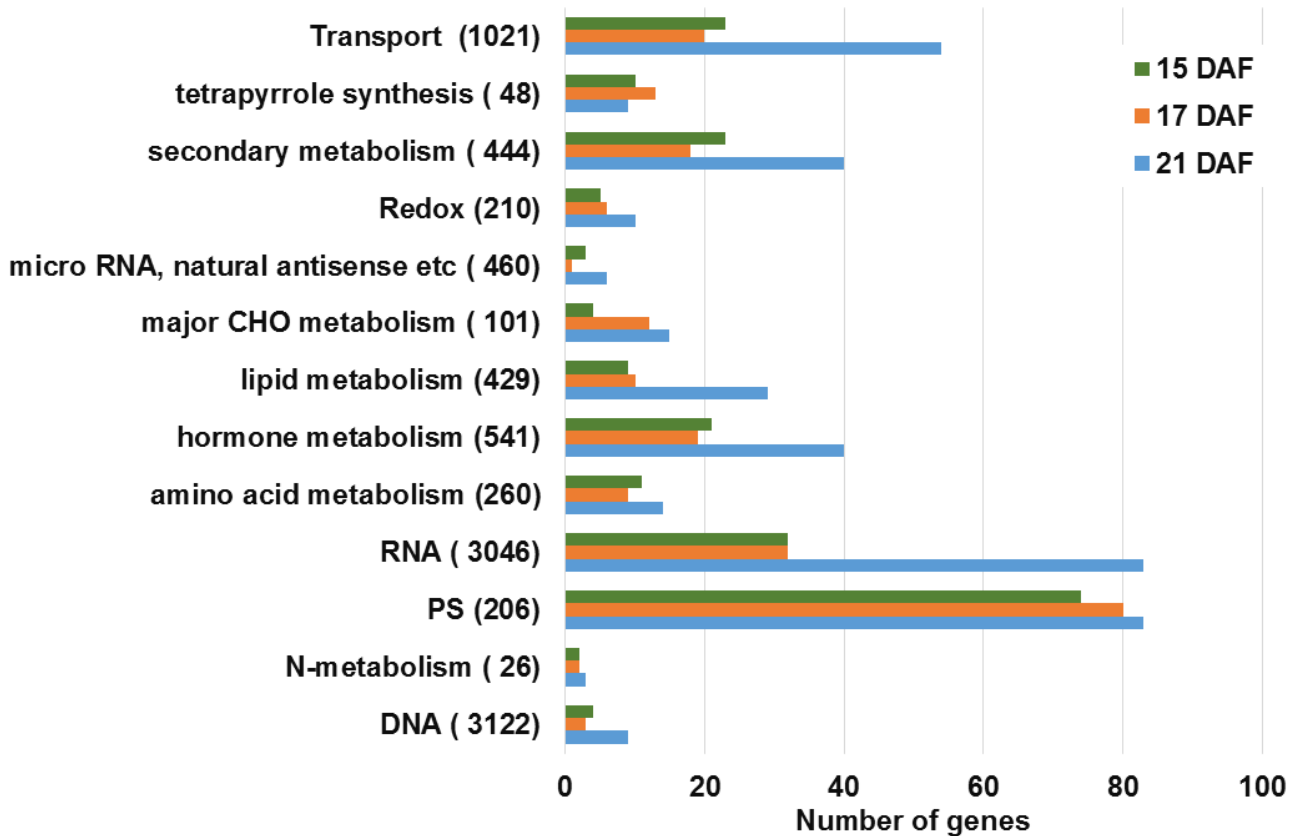

**Figure S4. MAPMAN-based functional classification of upregulated DEGs in *lec1*, *lec2*, *fus3* and *abi3-5* during seed desiccation tolerance.** (a) MAPMAN classification of the transcripts using the web-tool Classification Superviewer (<http://bar.utoronto.ca>). All categories are significant (P value <0.05). CHO, carbohydrate; PS, photosynthesis.

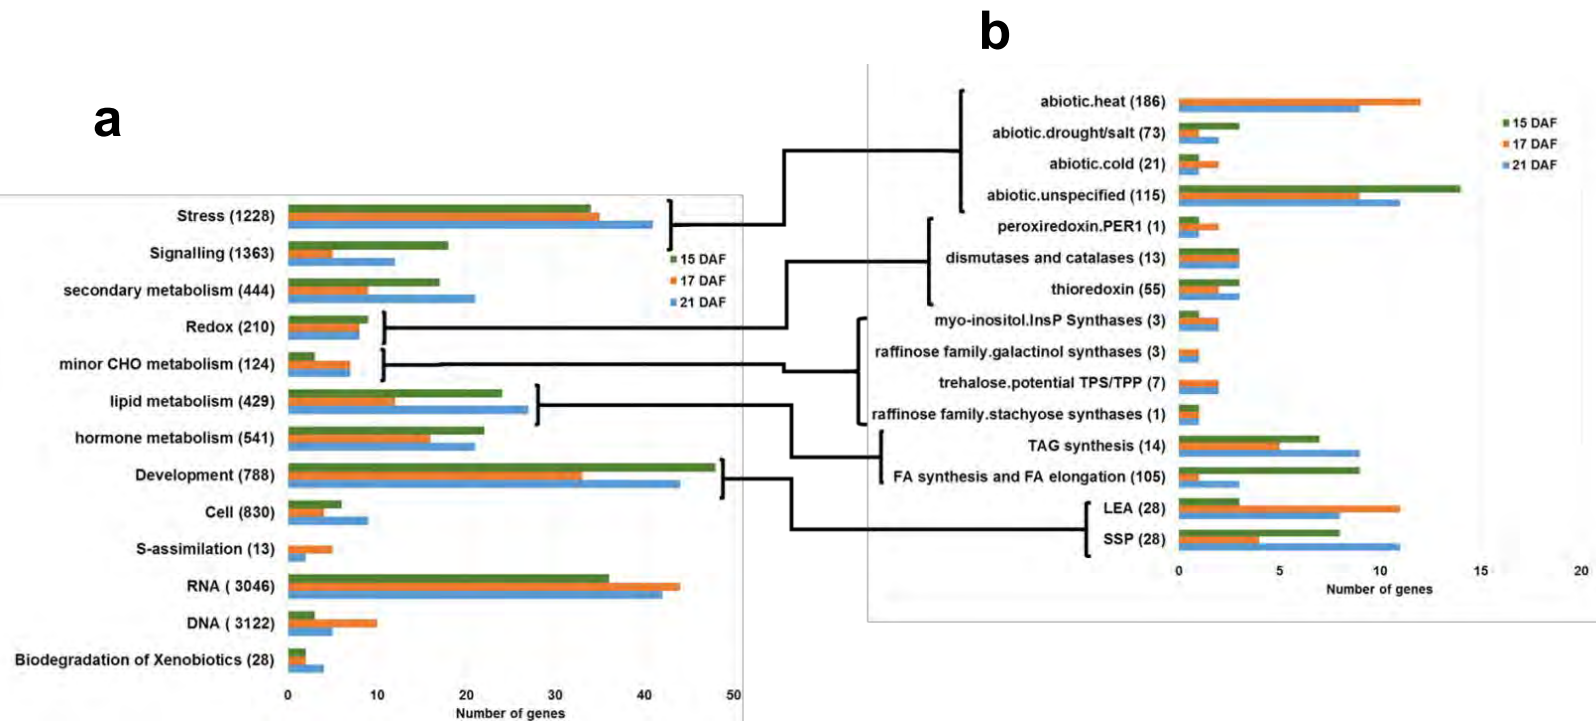

**Figure S5. MAPMAN-based functional classification of downregulated DEGs in desiccation intolerant lines during seed desiccation tolerance.** MAPMAN (a) categories and (b) subcategories classification of the downregulated transcripts using the web-tool Classification Superviewer (<http://bar.utoronto.ca>). All categories are significant ( $P$  value  $<0.05$ ). CHO, carbohydrate; TPS, Trehalose-6-Phosphate Synthase; TPP, Trehalose-6-Phosphate Phosphatase; TAG, triacylglycerol; LEA, late embryogenesis abundant; SSP, storage seed proteins.

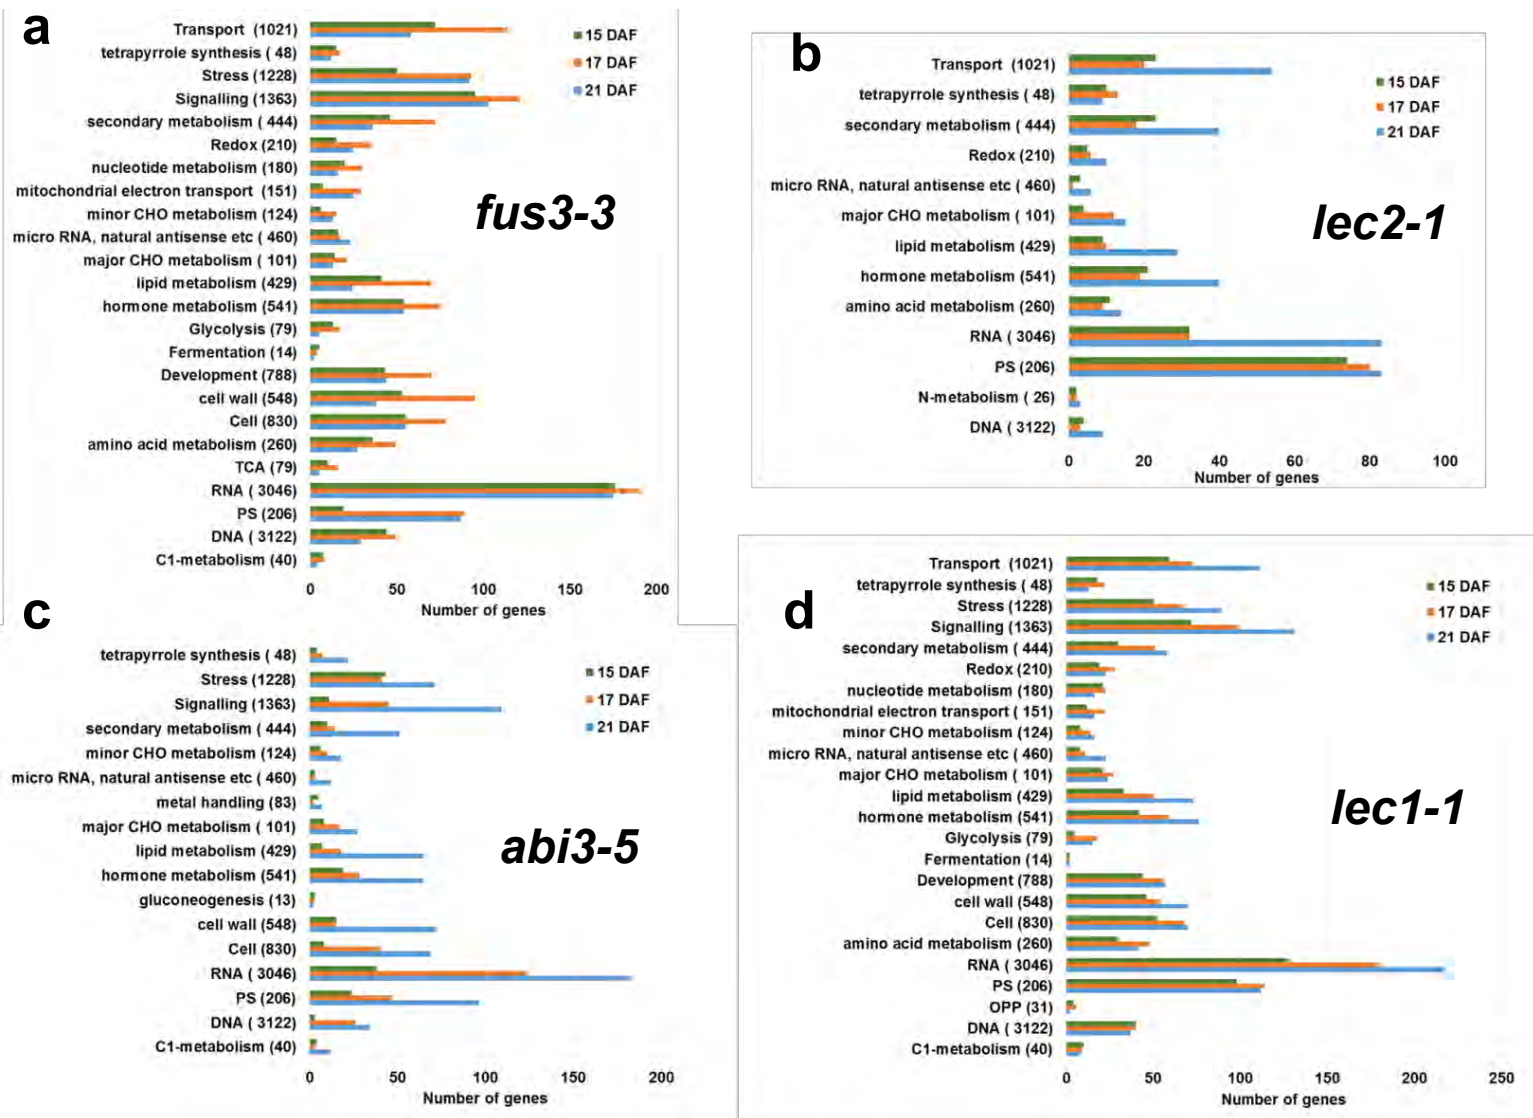

**Figure S6. MAPMAN-based functional classification of upregulated DEGs in each mutant line during seed desiccation tolerance.** (a) *fus3-3* vs Col-0 (b) *lec2-1* vs *Ws* (c) *abi3-5* vs *Ler* and (d) *lec1-1* vs *Ws* contrasts. MAPMAN classification of the transcripts using the web-tool Classification Supreviewer (<http://bar.utoronto.ca>). All categories are significant (P value <0.05). CHO, carbohydrate; OPP, oxidative pentose phosphate; PS, photosynthesis; TCA, tricarboxylic.

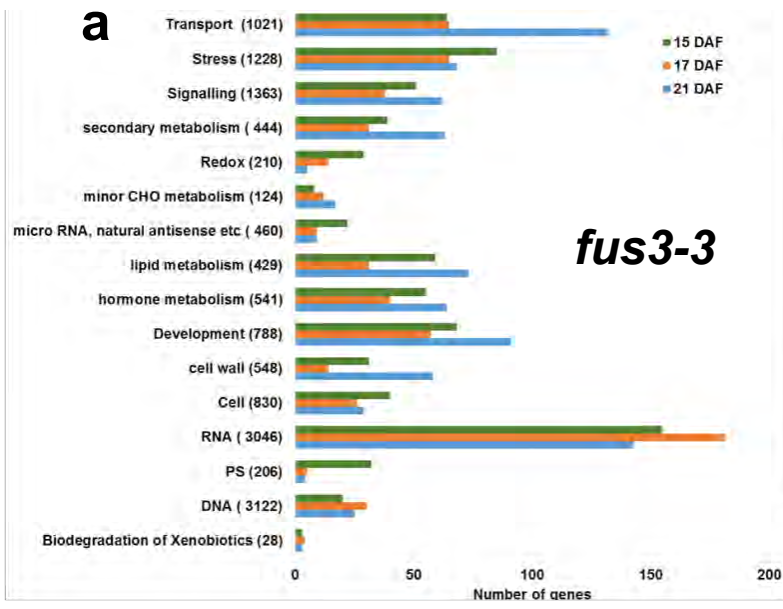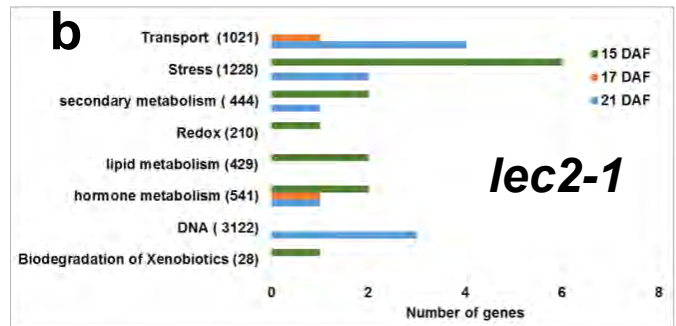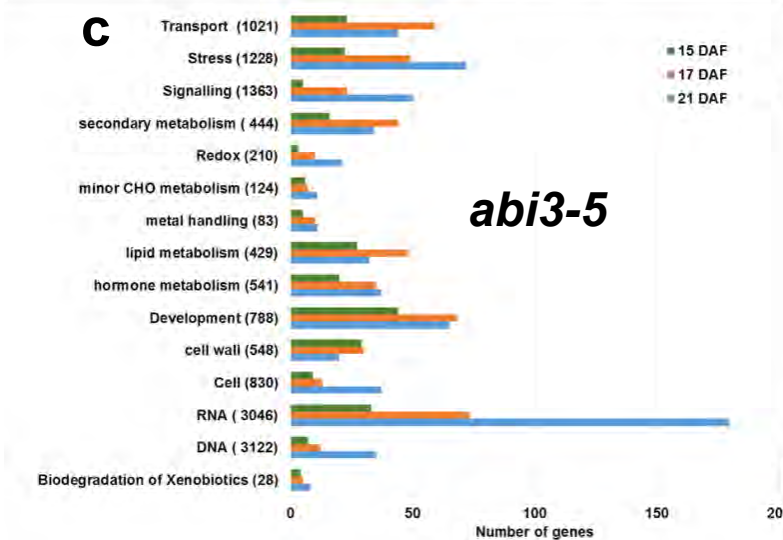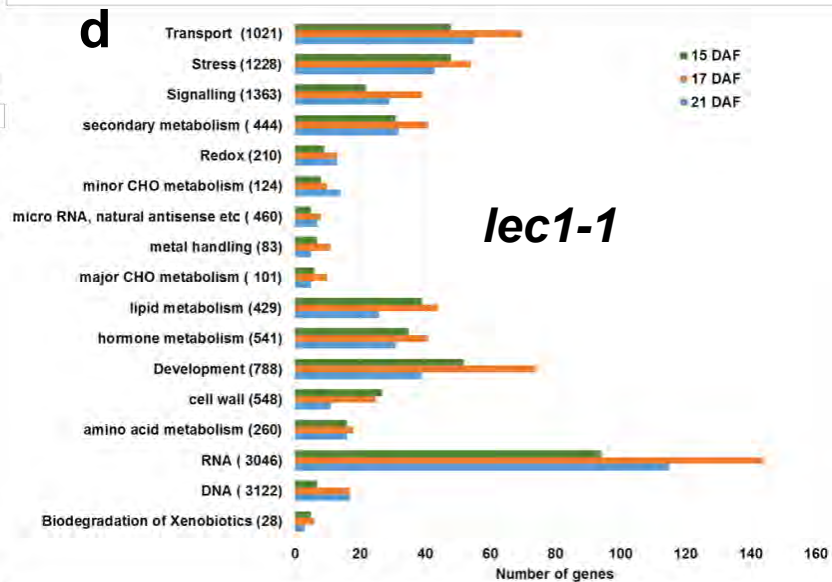

**Figure S7. MAPMAN-based functional classification of downregulated DEGs in each mutant line during seed desiccation tolerance.** (a) *fus3-3* vs Col-0 (b) *lec2-1* vs Ws (c) *abi3-5* vs Ler and (d) *lec1-1* vs Ws contrasts. MAPMAN classification of the transcripts using the web-tool Classification Supervisor (<http://bar.utoronto.ca>). All categories are significant (P-value <0.05). CHO, carbohydrate.



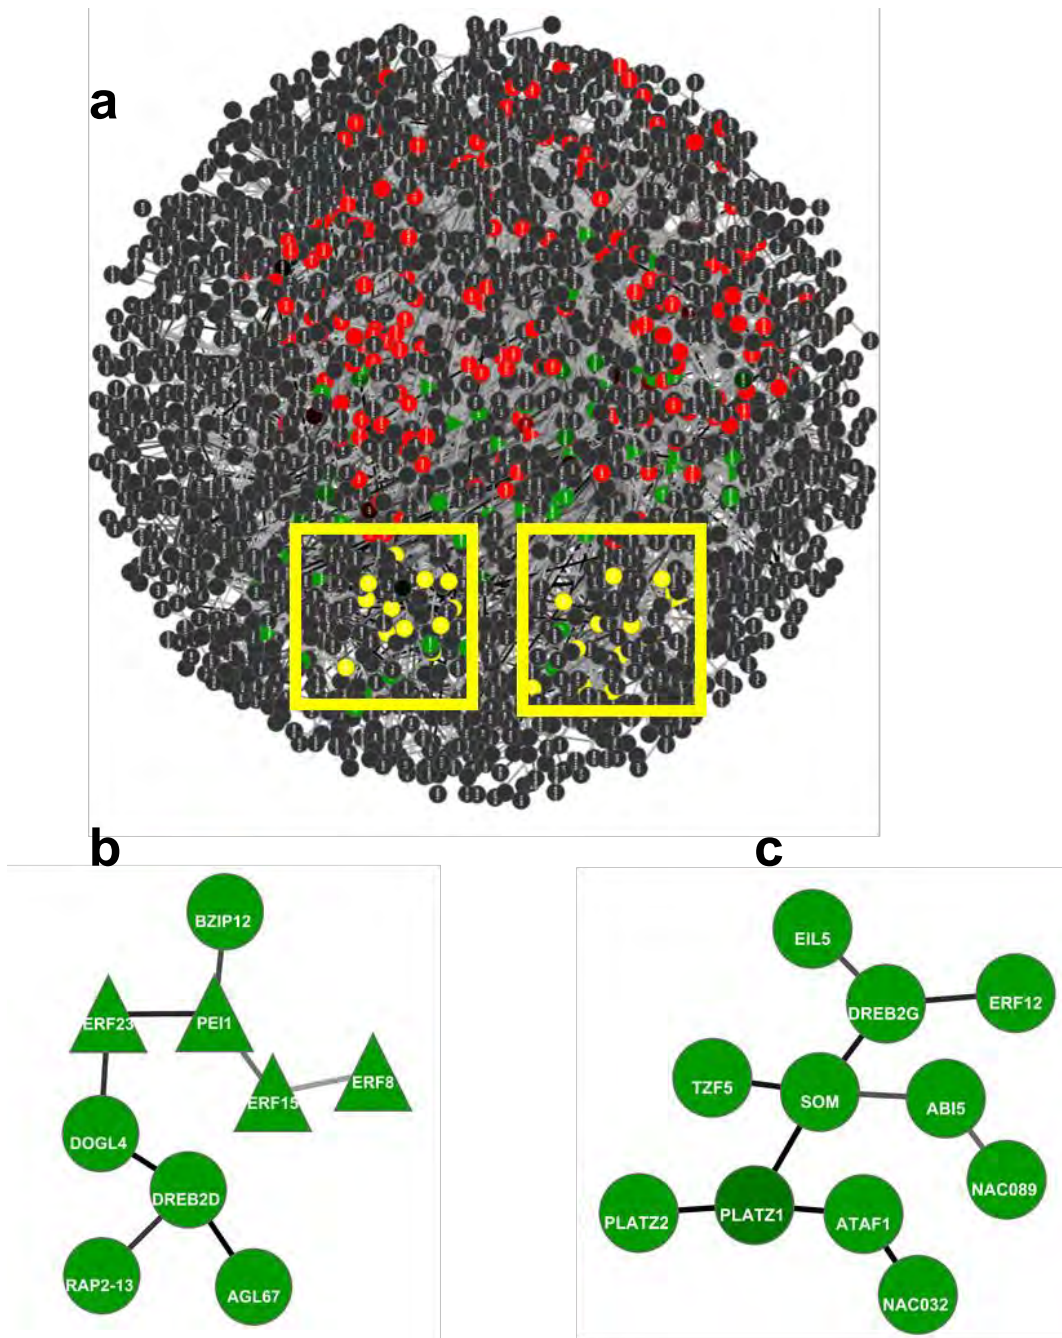

**Figure S8. The whole gene regulatory network TFsSeedNet.** (a) Overview of the TFsSeedNet obtained at DPI0.0. (b) TFsSeed-sNetDT1 and (c) TFsSeed-sNetDT2 subnetworks of the most representative downregulated in desiccation intolerant lines. Genes are represented as nodes and inferred interactions as edges (lines). Nodes are colored grey, except upregulated TFs in red and downregulated TFs in green from DT analysis. Edge width and color intensity is proportional to the Mutual Information (MI) value of the interaction, with higher MI values corresponding to thicker and darker edges. Triangular nodes represent genes expressed exclusively at 15DAF and circular nodes represent genes expressed at more than one time point.

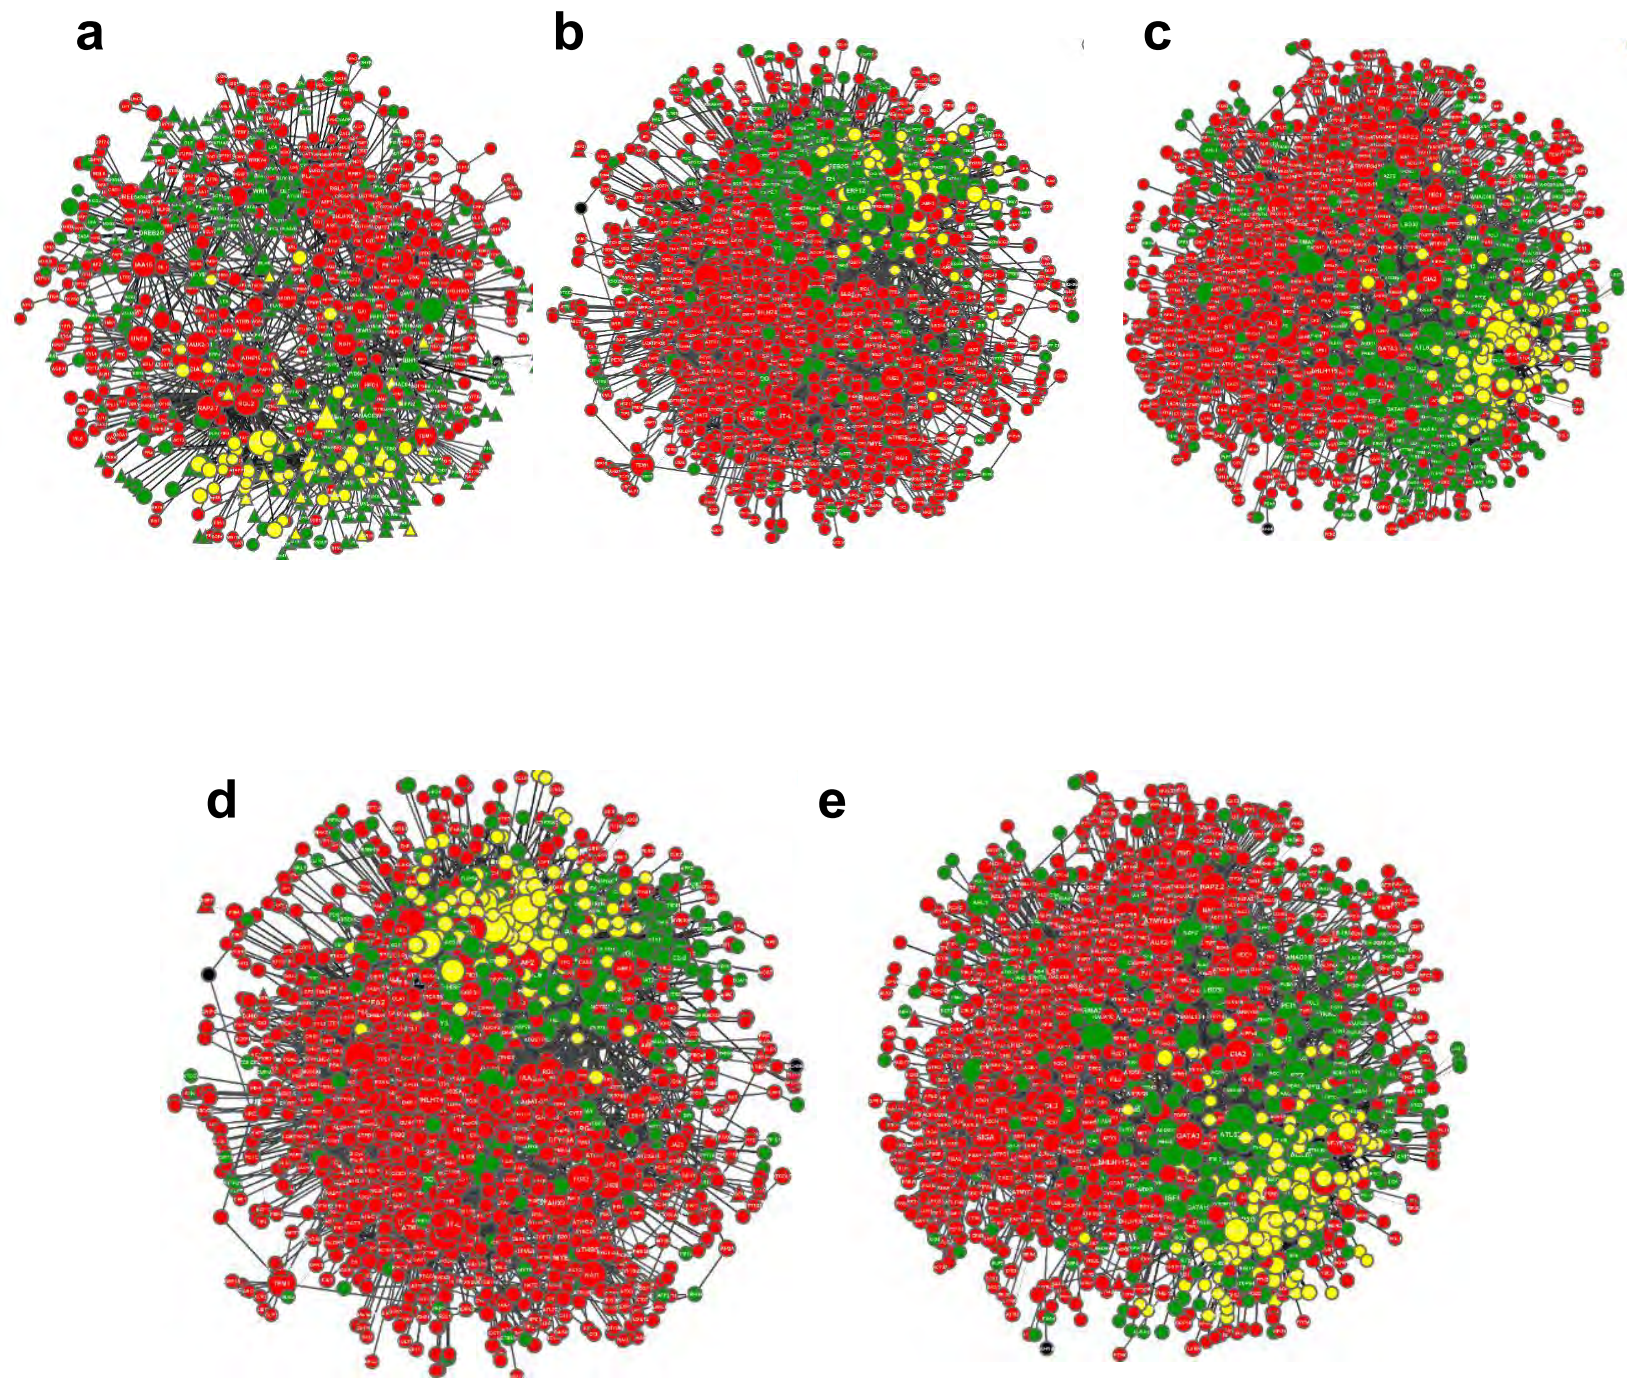

**Figure S9. The whole temporal gene regulatory network FullSeedNet.** (a), (b) and (c) represent the FullSeed-sNetDT1 related to nutrient storage. (d) and (e) represent the FullSeed-sNetDT2 related to cellular protection mechanism. Overview of the FullSeedNet obtained at DPI 0.1 at (a) 15, (b) and (d) 17 and (c) and (e) 21 DAF. Genes are represented as nodes and inferred interactions as edges. Nodes are colored grey, except upregulated genes in red and downregulated genes in green from DT analysis. Edges width and color intensity is proportional to the Mutual Information (MI) value of the interaction, with higher MI values corresponding to thicker and darker edges. Yellow nodes in represent the FullSeed-sNetDT1 and FullSeed-sNetDT2 at 15, 17 and 21 DAF..

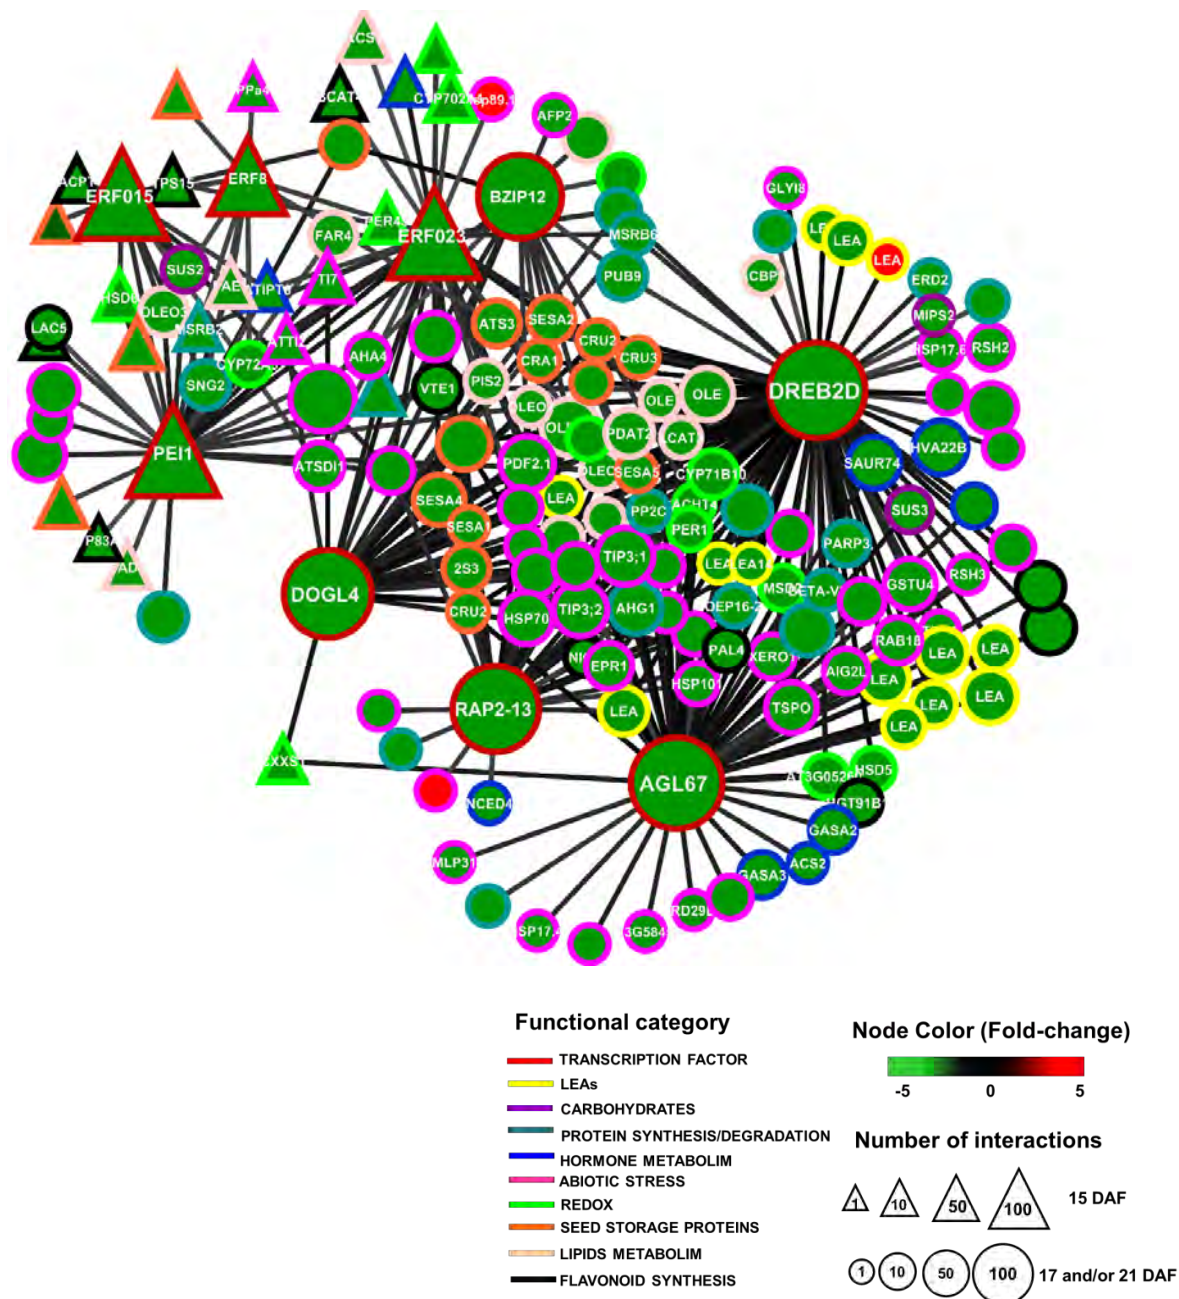

**Figure S10. FullSeed-sNetDT1 related to stress and nutrient storage.** Subnetworks were obtained from FullSeedNet at DPI 0.1. Genes are represented as nodes and inferred interactions as edges. Information box shows attributes in the networks. Triangular nodes represent genes expressed exclusively at 15DAF and circular nodes represent genes expressed at more than one time point. The border node color represent the functional category see Supplementary Table 18 and 19. Edge width and color intensity is proportional to the Mutual Information (MI) value of the interaction, with higher MI values corresponding to thicker and darker edges.

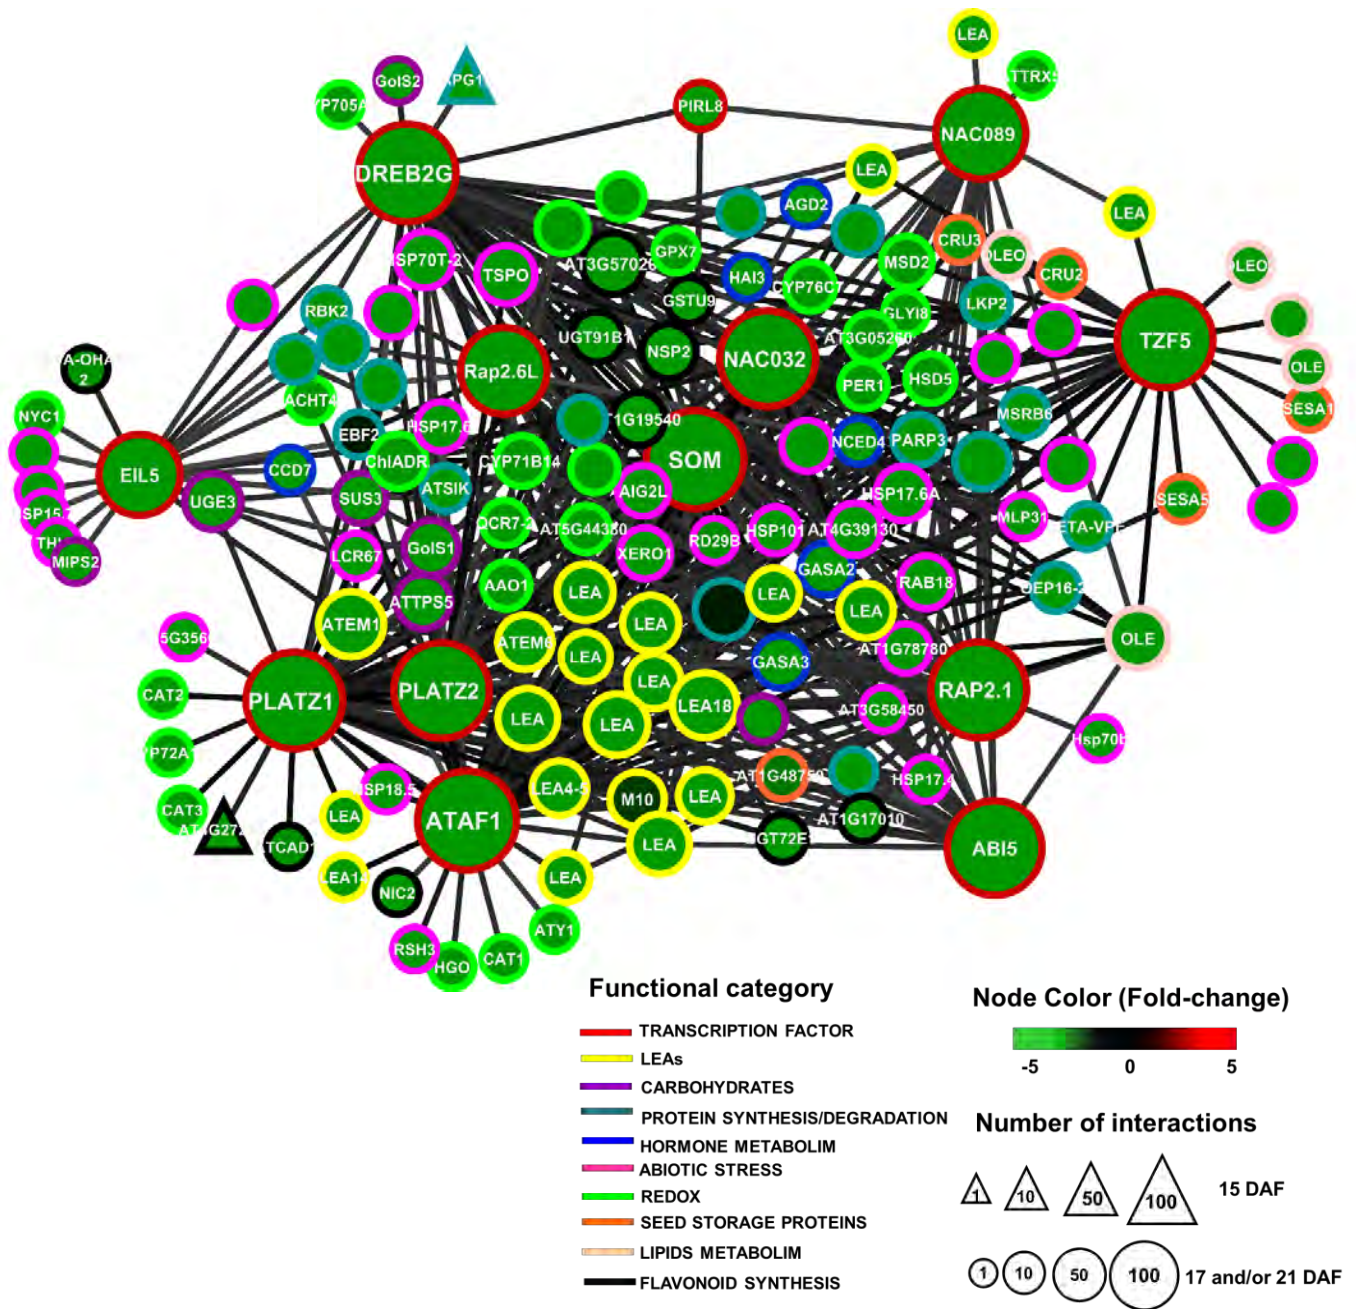

**Figure S11. FullSeed-sNetDT1 related to cellular protection mechanisms.** Subnetworks were obtained from FullSeedNet at DPI 0.1. Genes are represented as nodes and inferred interactions as edges. Information box shows attributes in the networks. Triangular nodes represent genes expressed exclusively at 15DAF and circular nodes represent genes expressed at more than one time point. The border node color represents the functional category (see Supplementary Table 20 and 21). Edge width and color intensity is proportional to the Mutual Information (MI) value of the interaction, with higher MI values corresponding to thicker and darker edges.

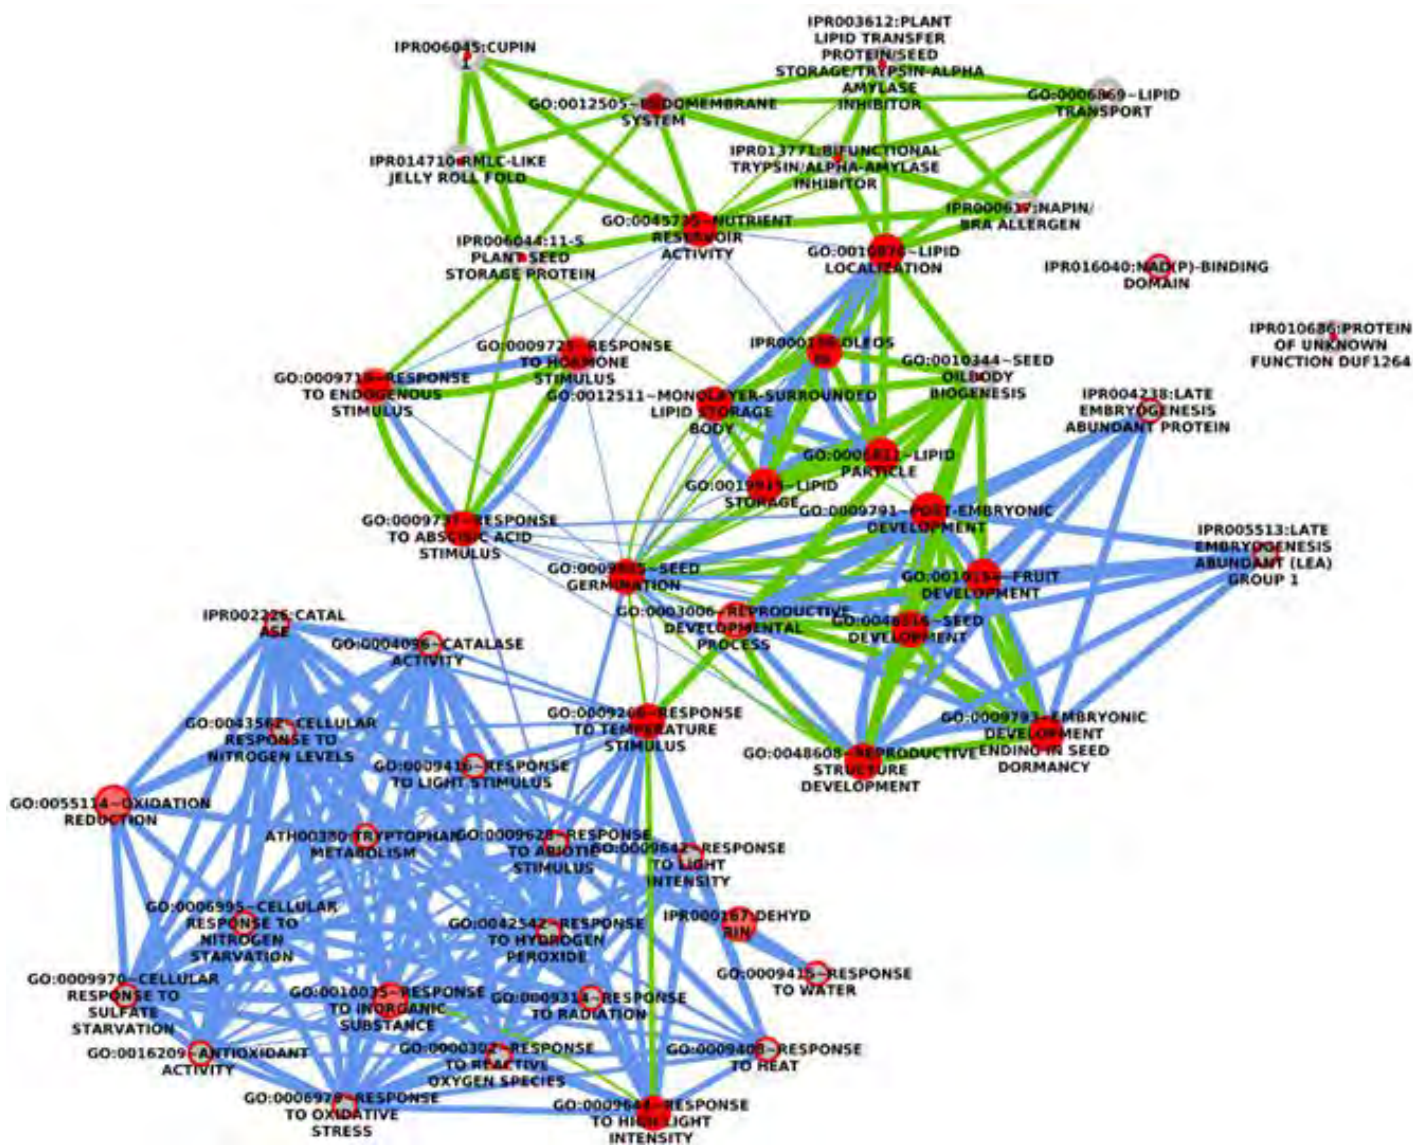

**Figure S12. Comparative analysis of the functional enriched category between FullSeed-sNetDT1 and FullSeed-sNetDT2 . .** Enrichment Map graph of category enrichments calculated with David for genes in snetFullDT1 and snetFullDT2. Node (inner circle) size corresponds to the number of genes in snetFullDT1 within the geneset. Node border (outer circle) size corresponds to the number of genes in snetFullDT2 within the geneset. Nodes in red belong to genes categories that are only enriched in snetFullDT1. Nodes border red represent gene categories that are enriched snetFullDT2. Edge size corresponds to the number of genes that overlap between the two connected genesets. Green edges corresponds to snetFullDT1 and blue corresponds to snetFullDT2.

**a**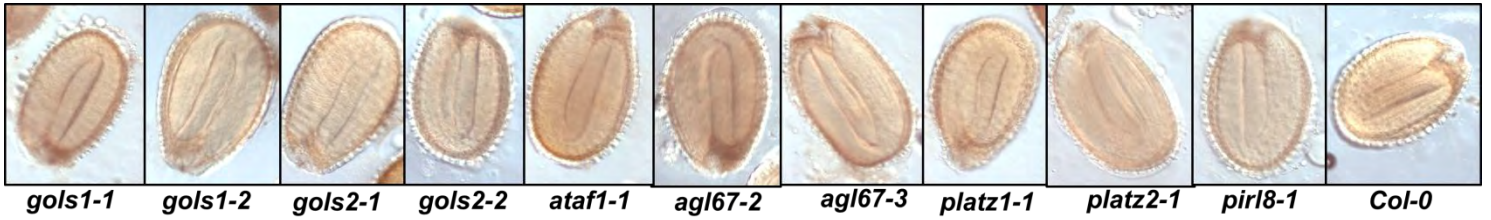**b**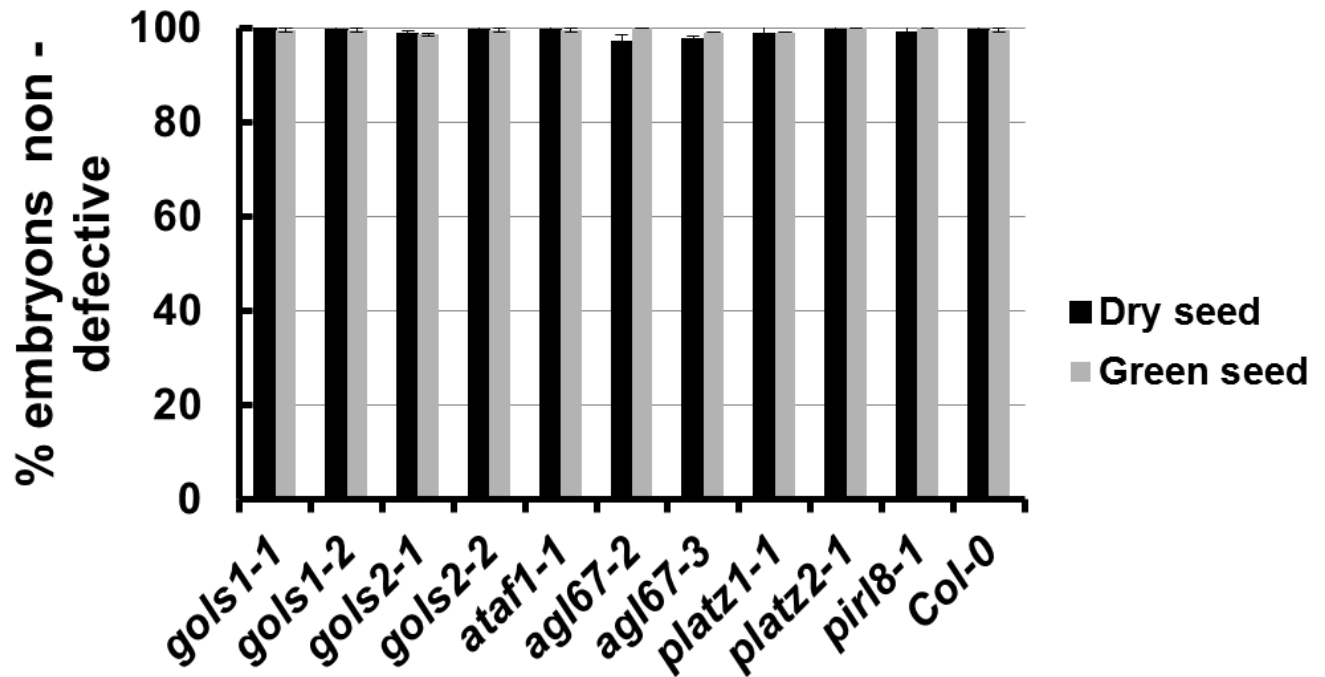

**Figure S13. Embryos defective in T-DNA mutants seeds.** (a) The visualization and (b) counting defective seeds were performed clearing dry and mature green seeds with Hoyer's solution overnight and visualized with microscope equipped with Nomarski optics. Values are means  $\pm$  SD of two biological replicates for 100 seeds.

**a**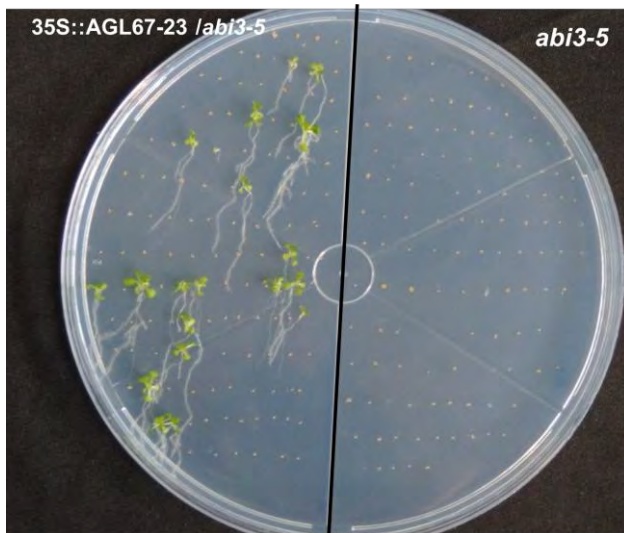**b**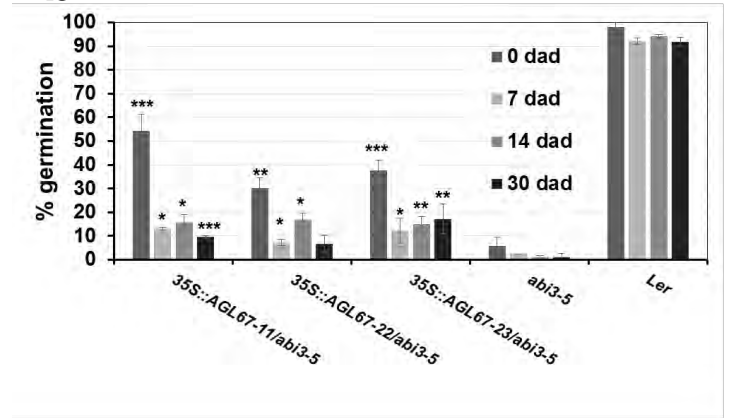**c**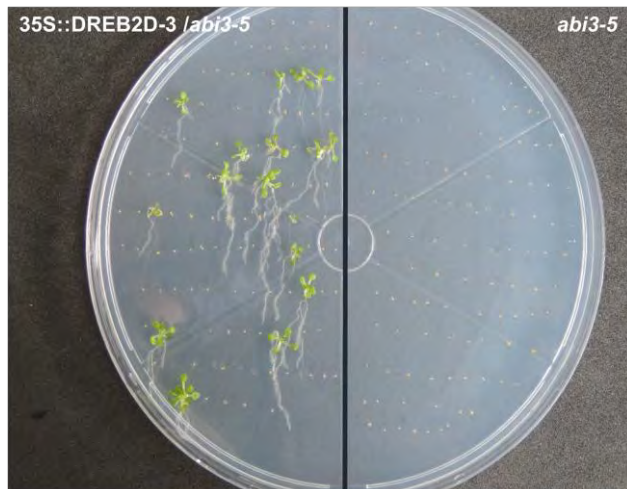**d**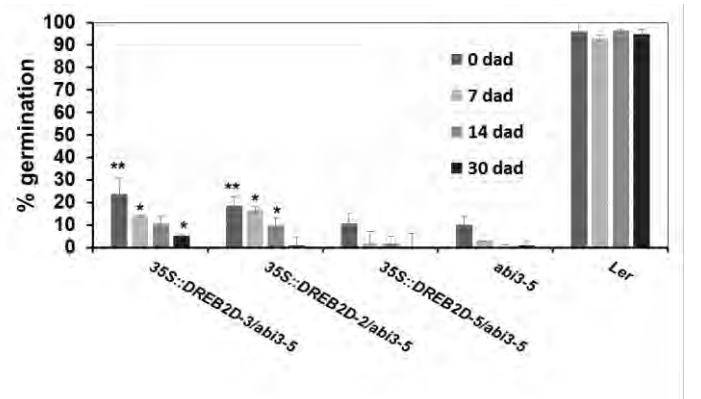

**Figure S14. Overexpression of AGL67 and DREB2A partially rescues *abi3-5* intolerance desiccation phenotype.** (a) Germination efficiency of 35S::AGL67-23/*abi3-5*; (b) Germination percentage of Ler, *abi3-5* and 35S::AGL67/*abi3-5* lines; (c) Germination efficiency of 35S::DREB2D-3/*abi3-5* (b) Germination percentage of Ler, *abi3-5* and 35S::DREB2D-3/*abi3-5* lines. For all experiments seeds at 21 DAF were stored for 0, 7, 14 and 30 days after desiccation (dad) to assess DT. Values are means  $\pm$  SD of three biological replicates for 100 seeds. Statistical analysis of the data was done using a student t-test. Bars with asterisks are significantly different from the control (\* =  $P < 0.05$ , \*\* =  $P < 0.01$ , \*\*\*  $P < 0.0001$ ).

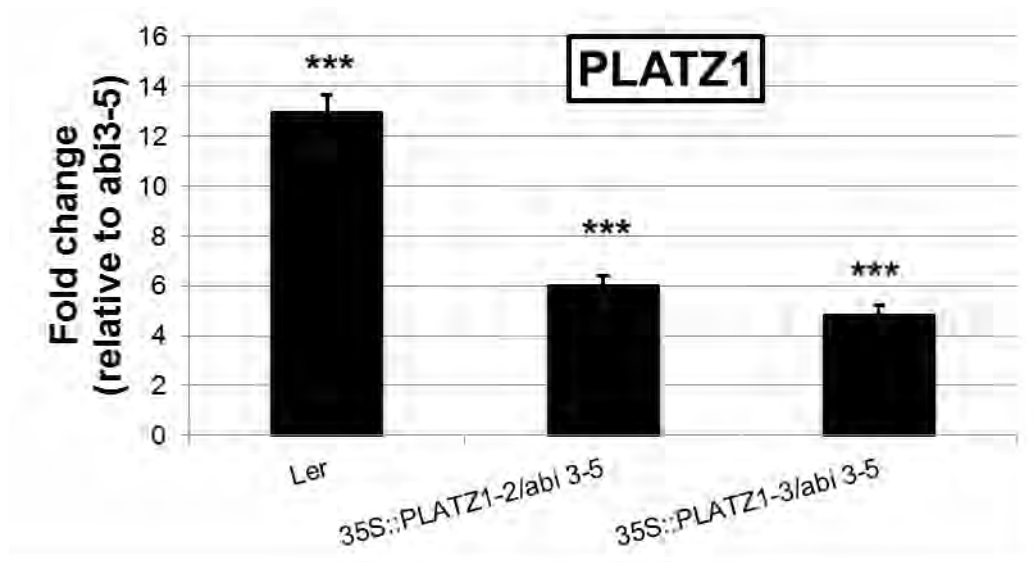

**Fig. S15. Real Time PCRs of PLATZ1 in 35S::PLATZ1/abi3-5 lines seeds at 21DAF.** *abi3-5* was used as the reference sample. UBQ10 and TIP4L served as internal controls. Data are the means  $\pm$  SD of two biological replicates and three technical replicates. Values are means and  $\pm$ SD of two biological replicates. Bars with asterisks are significantly different from the control (Student's t-test, \* =  $P < 0.05$ , \*\* =  $P < 0.01$ , \*\*\*  $P < 0.0001$ ).



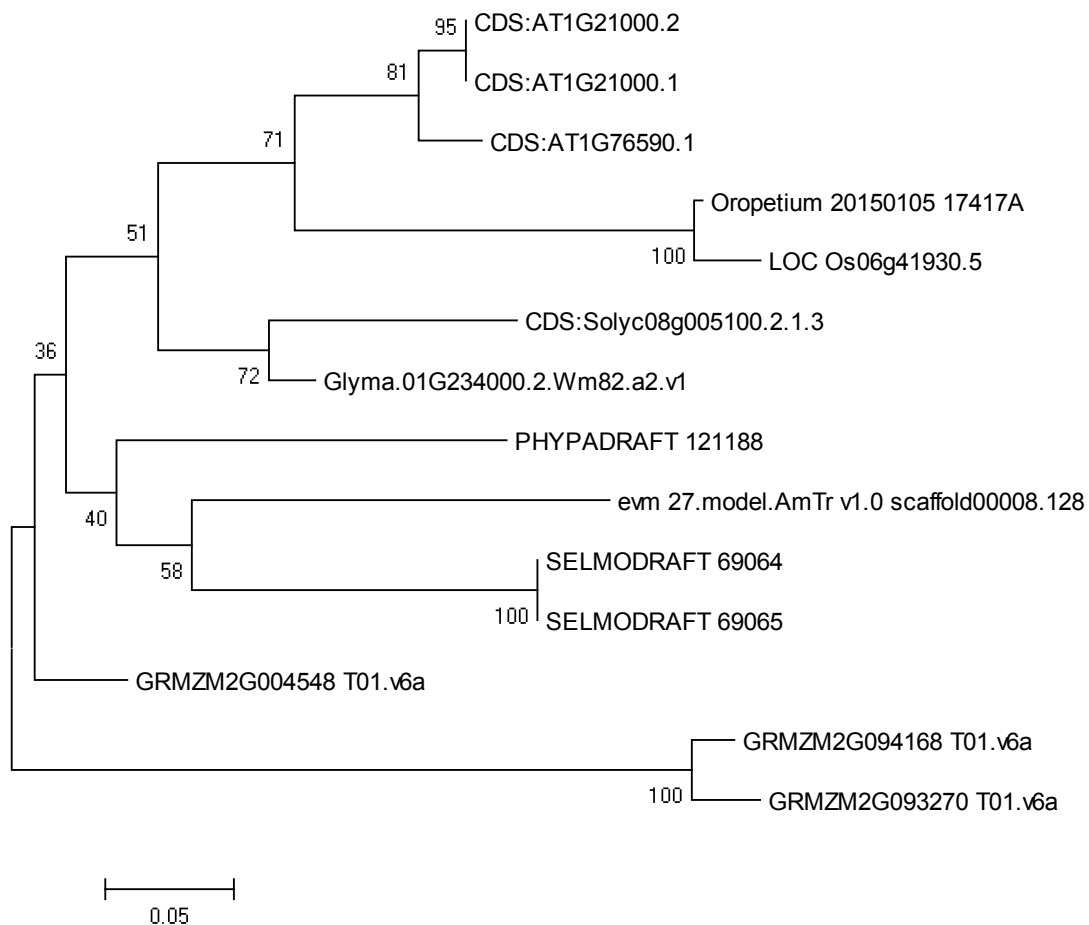

**Figure S16. Phylogenetic analysis of PLATZ1 and PLATZ2.** The NJ tree was constructed from the amino acid sequences of the PLATZ1 and PLATZ2 domain using the MEGA 6 program based on the JTT model. A consensus tree (after 1000 bootstrap samplings) is shown, and support values are indicated on the sides of important nodes. The BLAST was performed with CoGe Blast tool (<https://genomevolution.org/coge/CoGeBlast.pl>). PHYPADRAFT 121188 (*Physcomitella patens* genome v.1 from NCBI database), SELMODRAFT 69064 and SELMODRAFT 69065 (*Selaginella mollendorffii* genome v.1 from NCBI database), evm 27.model.AmTr v1.0 scaffold00008.128 (*Amborella trichopoda* genome v.2 from Amborella Genome Consortium), LOC Os06g41930.5 (*Oryza sativa japonica* from MSU: Rice Genome Annotation v.7), Oropetium 20150105 17417A (*Oropetium thomaeum* genome v.1 from PacBio), Solyc08g005100.2.1.3 (*Solanum Lycopersicum* genome v.2 from SGN), Glyma.01G234000.2.Wm82.a2.v1 (*Glycine Max* genome v.1 from JGI ), AT1G21000 and AT1G76590 (*Arabidopsis thaliana* genome TAIR10 from Ensembl Plants) GRMZM2G004548 T01.v6a, GRMZM2G094168 T01.v6a and GRMZM2G093270 T01.v6a (*Zea mays* genome v.6 from Ensembl Plants).

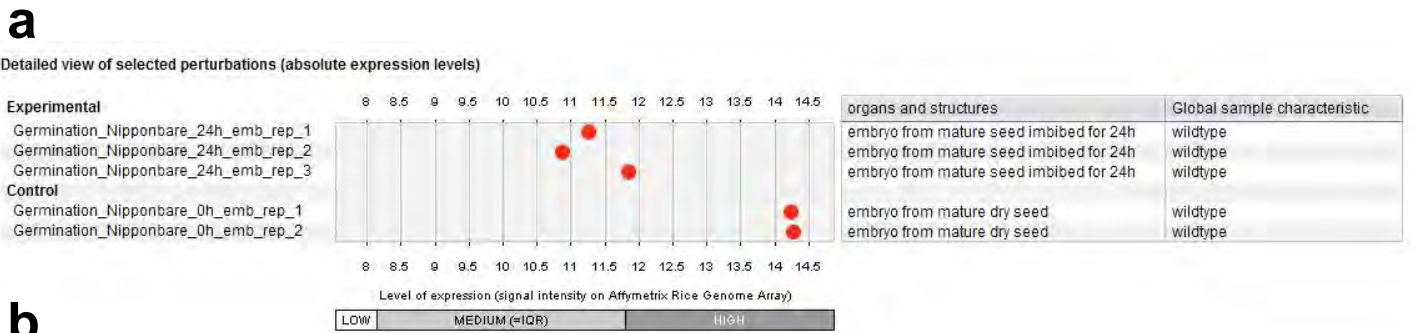

created with GENEVESTIGATOR

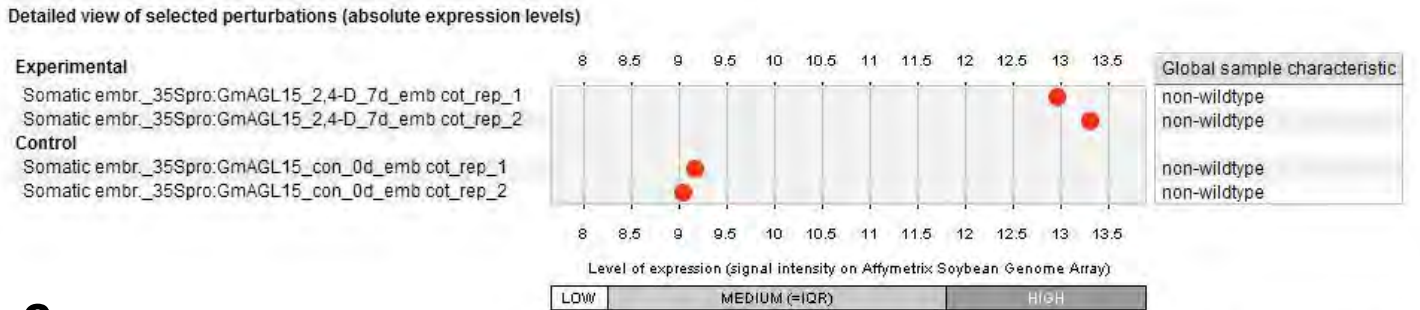

created with GENEVESTIGATOR

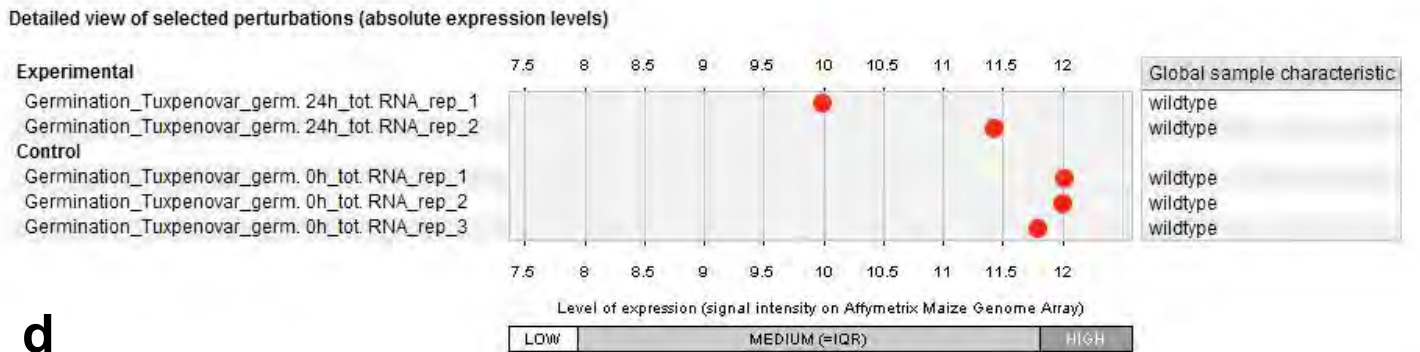

created with GENEVESTIGATOR

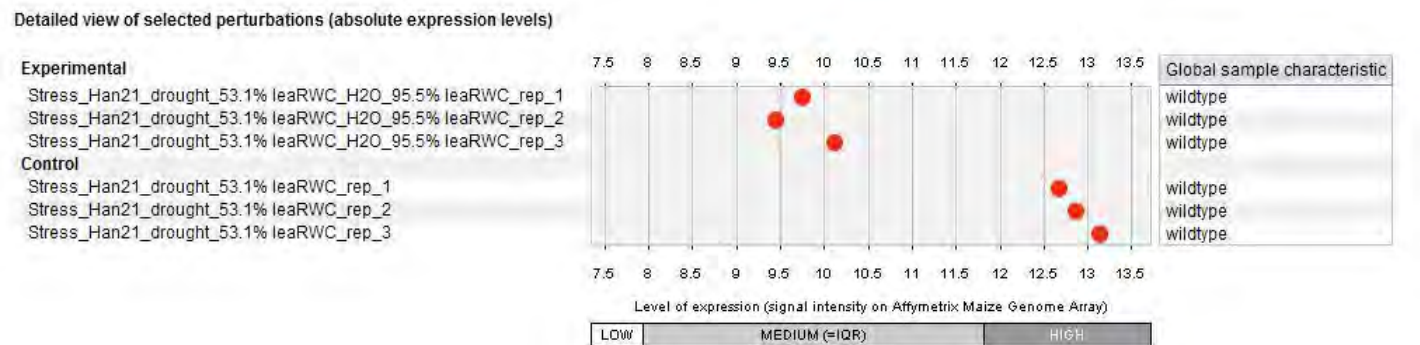

created with GENEVESTIGATOR

**Figure S17. Expression pattern of possible orthologues of PLATZ1.** Expression analysis was determined using the Genevestigator database. (a) LOC Os06g41930.5 (*Oryza sativa japonica*) (b) Glyma.01G234000.2.Wm82.a2.v1 (*Glycine Max*), (c) and (d) GRMZM2G004548 T01.v6a (*Zea mays*).

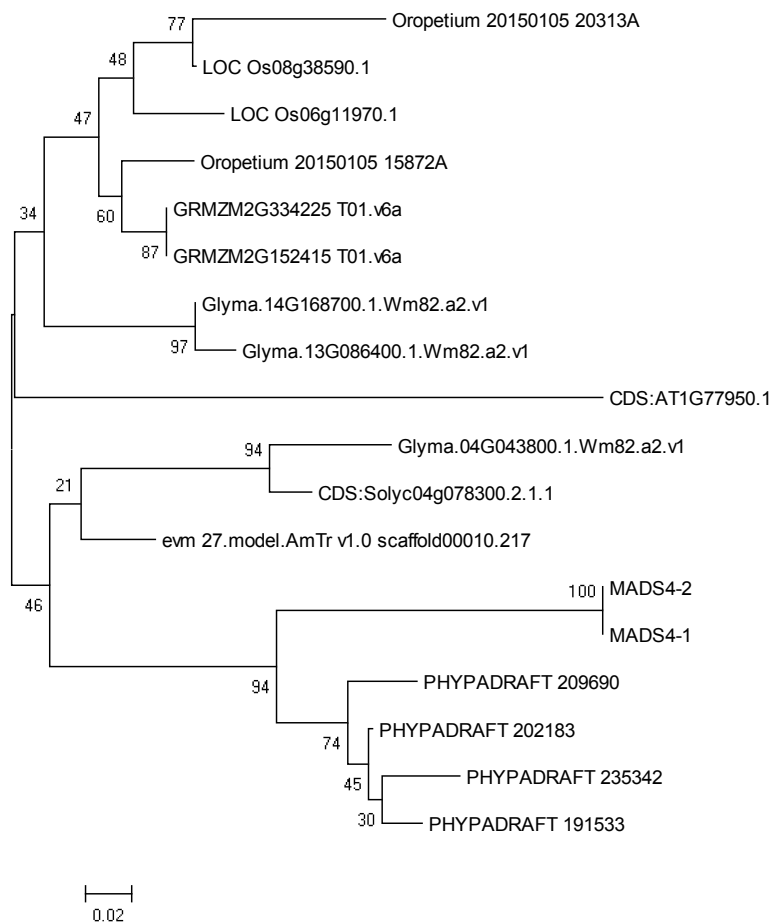

**Figure S18. Phylogenetic of AGL67.** The NJ tree was constructed from the amino acid sequences of the AGL67 domain using the MEGA6 program based on the JTT model. A consensus tree (after 1000 bootstrap samplings) is shown, and support values are indicated on the sides of important nodes. The BLAST was performed with CoGe Blast tool (<https://genomeevolution.org/coge/CoGeBlast.pl>). PHYPADRAFT 202183, PHYPADRAFT 235342, PHYPADRAFT 191533 and PHYPADRAFT 209690 (*Physcomitella patens* genome v.1 from NCBI database), MADS4-2 and MADS4-1 (*Selaginella mollendorffii* genome v.1 from NCBI database), evm 27.model.AmTr v1.0 scaffold00010.217 (*Amborella trichopoda* genome v.2 from Amborella Genome Consortium), LOC Os08g38590.1 and LOC Os06g11970.1 (*Oryza sativa japonica* from MSU: Rice Genome Annotation v.7), Oropetium 20150105 20313A and Oropetium 20150105 15872Ac (*Oropetium thomaeum* genome v.1 from PacBio), Solyc04g078300.2.1.1 (*Solanum Lycopersicum* genome v.2 from SGN), Glyma.04G043800.1.Wm82.a2.v1, Glyma.14G168700.1.Wm82.a2.v1 and Glyma.13G086400.1.Wm82.a2.v1 (*Glycine Max* genome v.1 from JGI ), AT1G77950 (*Arabidopsis thaliana* genome TAIR10 from Ensembl Plants) GRMZM2G334225 T01.v6a and GRMZM2G152415 T01.v6a (*Zea mays* genome v.6 from Ensembl Plants).

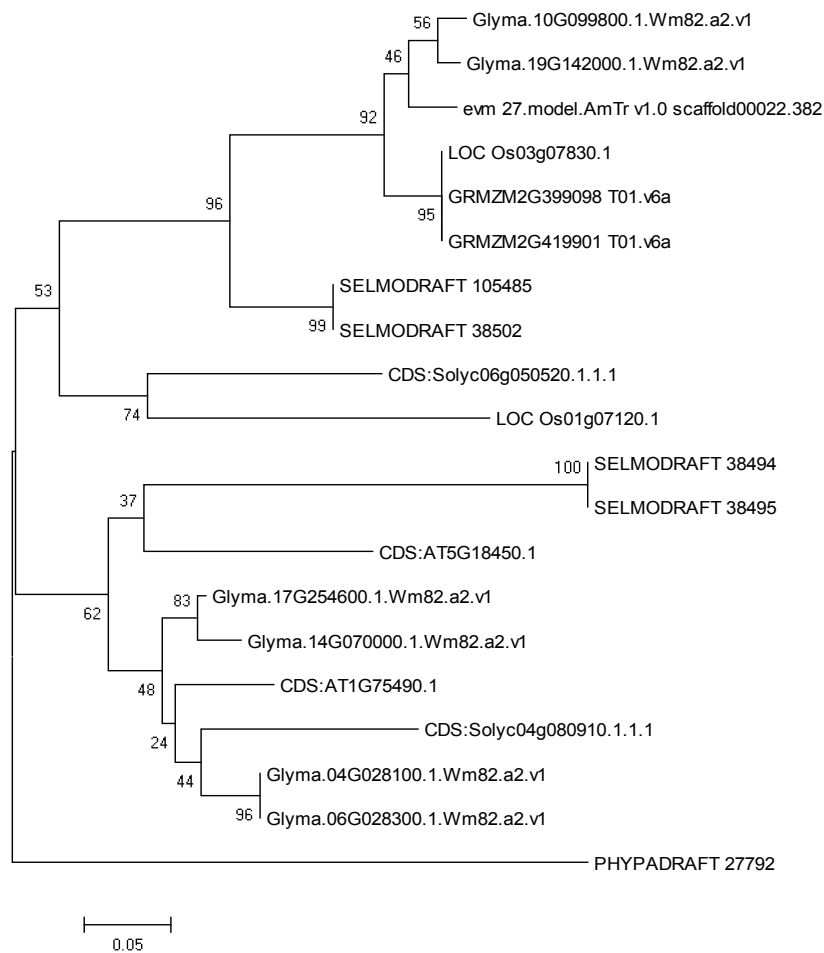

**Figure S19. Phylogeny of DREB2D and DREB2G.** The NJ tree was constructed from the amino acid sequences of the DREB2D and DREB2G domain using the MEGA6 program based on the JTT model. A consensus tree (after 1000 bootstrap samplings) is shown, and support values are indicated on the sides of important nodes. The BLAST was performed with CoGe Blast tool (<https://genomeevolution.org/coge/CoGeBlast.pl>), PHYPADRAFT 27792 (*Physcomitella patens* genome v.1 from NCBI database), SELMODRAFT 69064 and SELMODRAFT 105485, SELMODRAFT 38502, SELMODRAFT 38494 and SELMODRAFT 38495 (*Selaginella mollendorffi* genome v.1 from NCBI database), evm 27.model.AmTr v1.0 scaffold00022.382 (*Amborella trichopoda* genome v.2 from Amborella Genome Consortium), LOC Os03g07830.1 (*Oryza sativa japonica* from MSU: Rice Genome Annotation v.7) Solyc06g050520.1.1.1 and Solyc04g080910.1.1.1 (*Solanum Lycopersicum* genome v.2 from SGN), Glyma.10G099800.1.Wm82.a2.v1, Glyma.19G142000.1.Wm82.a2.v1, Glyma.17G254600.1.Wm82.a2.v1, Glyma.14G070000.1.Wm82.a2.v1, Glyma.04G028100.1.Wm82.a2.v1 and Glyma.06G028300.1.Wm82.a2.v1 (*Glycine Max* genome v.1 from JGI ), AT5G18450.1 and AT1G75490.1 (*Arabidopsis thaliana* genome TAIR10 from Ensembl Plants) GRMZM2G399098 T01.v6a and GRMZM2G419901 T01.v6a (*Zea mays* genome v.6 from Ensembl Plants).

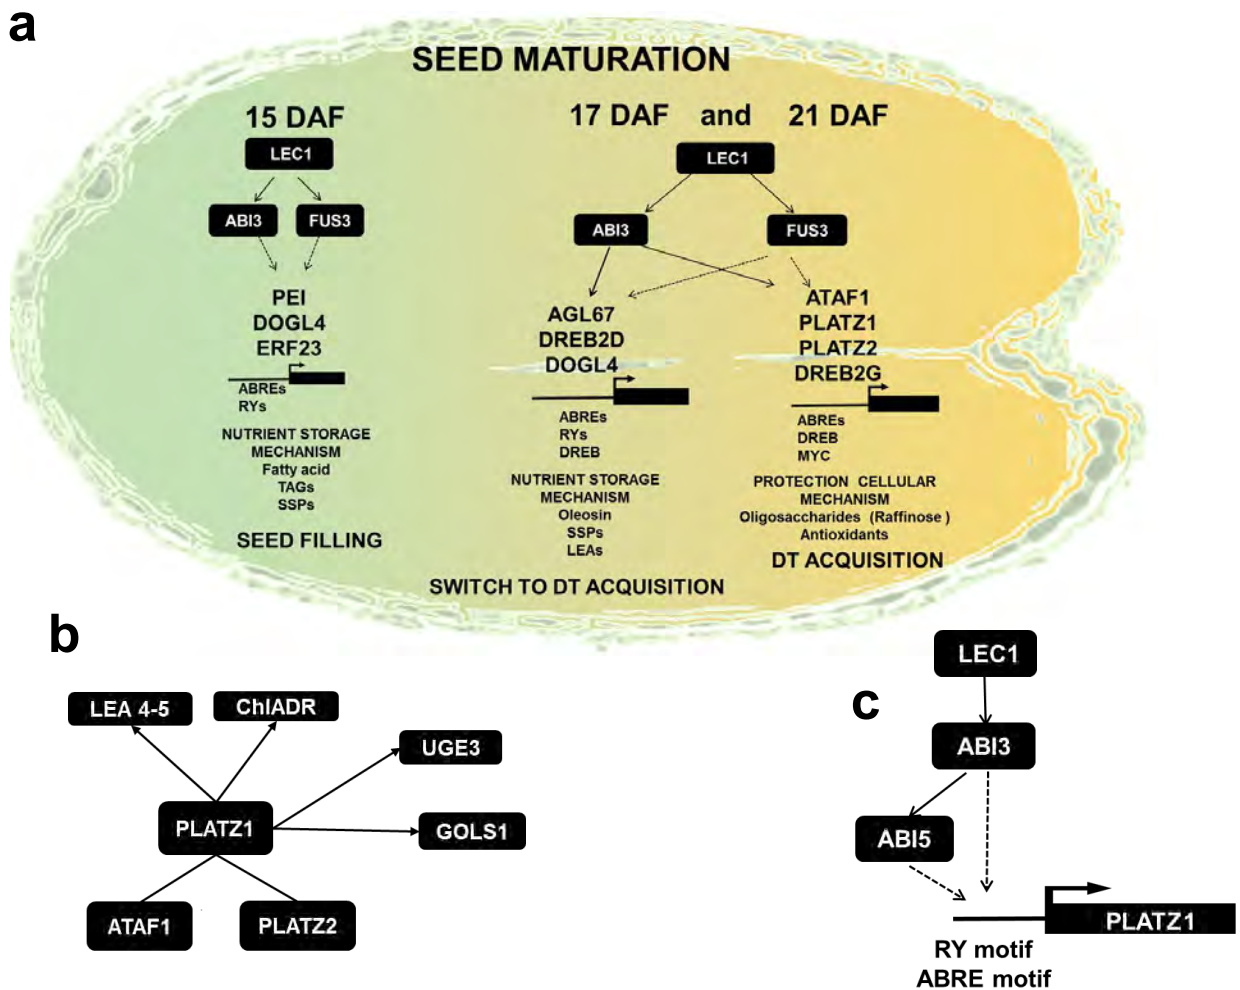

**Figure S20. Hypothetical model of desiccation tolerance seed regulation during seed maturation.** (a) Downstream of the LEC1, ABI3 and FUS3 master regulators, the expression of a number of TFs is activated at 15, 17 and 21 DAF. At 15 DAF the expression of genes related to storage of reserve compounds (seed filling) is activated. The cognate sites for these TFs are present in the promoter of maturation-specific genes. At 17 and 21DAF the expression of genes related to storage of reserve compounds is maintained, and a the expression of a different set of TFs is activated which in turn regulate the expression of effector genes involved in cell protection mechanism responsible for the acquisition of desiccation tolerance. The cognate binding sites for these second set of TFs is present in dehydration responsive genes. (b) PLATZ1 together with PLATZ2 and ATAF1 activate genes related to stress response and cell protection mechanisms, including gene belonging to LEA protein families, genes involved in the production of antioxidants and protective oligosaccharides. (c) PLATZ1 is a novel regulator of DT, which is transcriptionally activated by ABI3 and/or ABI5 in a network conserved during the evolution of land plants.

## References to supplementary text

1. Meinke DW, Franzmann LH, Nickle TC, & Yeung EC (1994) Leafy Cotyledon Mutants of Arabidopsis. *The Plant cell* 6(8):1049-1064.
2. Ooms J, Leon-Kloosterziel KM, Bartels D, Koornneef M, & Karssen CM (1993) Acquisition of Desiccation Tolerance and Longevity in Seeds of Arabidopsis thaliana (A Comparative Study Using Abscisic Acid-Insensitive abi3 Mutants). *Plant physiology* 102(4):1185-1191.
3. Keith K, Kraml M, Dengler NG, & McCourt P (1994) fusca3: A Heterochronic Mutation Affecting Late Embryo Development in Arabidopsis. *The Plant cell* 6(5):589-600.
4. McCarthy DJ, Chen Y, & Smyth GK (2012) Differential expression analysis of multifactor RNA-Seq experiments with respect to biological variation. *Nucleic acids research* 40(10):4288-4297.
5. Maere S, Heymans K, & Kuiper M (2005) BiNGO: a Cytoscape plugin to assess overrepresentation of Gene Ontology categories in Biological Networks. *Bioinformatics* 21(16):3448-3449.
6. Benjamini Y & Hochberg Y (1995) Controlling the False Discovery Rate: A Practical and Powerful Approach to Multiple Testing. *Journal of the Royal Statistical Society. Series B (Methodological)* 57(1):289-300.
7. Chavez Montes RA, et al. (2014) ARACNe-based inference, using curated microarray data, of Arabidopsis thaliana root transcriptional regulatory networks. *BMC plant biology* 14:97.
8. Shimada TL, Shimada T, & Hara-Nishimura I (2010) A rapid and non-destructive screenable marker, FAST, for identifying transformed seeds of Arabidopsis thaliana. *The Plant Journal* 61(3):519-528.
9. Martinez-Trujillo M, Limones-Briones V, Cabrera-Ponce J, & Herrera-Estrella L (2004) Improving transformation efficiency of Arabidopsis thaliana by modifying the floral dip method. *Plant Mol Biol Rep* 22(1):63-70.
10. Ye J, et al. (2012) Primer-BLAST: a tool to design target-specific primers for polymerase chain reaction. *BMC bioinformatics* 13:134.
11. Gazzarrini S, Tsuchiya Y, Lumba S, Okamoto M, & McCourt P (2004) The transcription factor FUSCA3 controls developmental timing in Arabidopsis through the hormones gibberellin and abscisic acid. *Developmental cell* 7(3):373-385.
12. Lumba S, et al. (2012) The embryonic leaf identity gene FUSCA3 regulates vegetative phase transitions by negatively modulating ethylene-regulated gene expression in Arabidopsis. *BMC biology* 10:8.
13. Basso K, et al. (2005) Reverse engineering of regulatory networks in human B cells. *Nature genetics* 37(4):382-390.
14. Margolin AA, et al. (2006) ARACNE: an algorithm for the reconstruction of gene regulatory networks in a mammalian cellular context. *BMC bioinformatics* 7 Suppl 1:S7.
